# Supplementary material for: Self-rated health and mortality in individuals with diabetes mellitus: prospective cohort study
Source: PubMed Central journal article supplement — BMJ Open. 2012 Feb 15;2(1):e000760. doi: 10.1136/bmjopen-2011-000760 (PMC3282291; doi:10.1136/bmjopen-2011-000760), 2012-02-15
Supplement: bmjopen-2011-000760-s1.pdf [file bmjopen-2011-000760-s1.pdf]

## Appendix

All questionnaires were standardized to fit the question (with four response alternatives):

*How satisfied are you today with your health?*

1 *Excellent*

2 *Good*

3 *Moderate*

4 *Poor*

Description of the original questions and how they were standardized:

Bilthoven 1993–94

Question: *What do you think about your health in general?*

| Response alternatives          | Standardized  |
|--------------------------------|---------------|
| 1 Excellent                    | 1 Excellent   |
| 2 Good                         | 2 Good        |
| 3 Reasonable                   | 3 Moderate    |
| 4 Mediocre                     | 4 Poor        |
| 5 Poor                         | 4 Poor        |
| 9 More than 1 option indicated | Missing value |

Bilthoven 1995–97

Question: *What do you think about your health in general?*

| Response alternatives          | Standardized  |
|--------------------------------|---------------|
| 1 Excellent                    | 1 Excellent   |
| 2 Very Good                    | 2 Good        |
| 3 Good                         | 2 Good        |
| 4 Reasonable                   | 3 Moderate    |
| 5 Mediocre                     | 4 Poor        |
| 9 More than 1 option indicated | Missing value |

Heidelberg

Question: *On the whole, how satisfied are you today with your health?*

| Response alternatives | Standardized  |
|-----------------------|---------------|
| 1 Very satisfied      | 1 Excellent   |
| 2 More satisfied      | 2 Good        |
| 3 More dissatisfied   | 3 Moderate    |
| 4 Very dissatisfied   | 4 Poor        |
| 8 Do not know         | Missing value |

Potsdam

Question: *On the whole, how satisfied are you today with your health?*

| Response alternatives      | Standardized  |
|----------------------------|---------------|
| 1 Very satisfied           | 1 Excellent   |
| 2 More likely satisfied    | 2 Good        |
| 3 More likely dissatisfied | 3 Moderate    |
| 4 Very dissatisfied        | 4 Poor        |
| 8 Do not know              | Missing value |

Umeå

Question: *How do you judge that your state of health has been in the last year?*

| Response alternatives | Standardized  |
|-----------------------|---------------|
| 1 Very well           | 1 Excellent   |
| 2 Quiet well          | 2 Good        |
| 3 Fairly well         | 3 Moderate    |
| 4 Quiet bad           | 4 Poor        |
| 5 Bad                 | 4 Poor        |
| 9 Inconsistent answer | Missing value |
