# Supplementary material for: Self-rated health and mortality in individuals with diabetes mellitus: prospective cohort study
Source: PubMed Central journal article supplement — BMJ Open. 2012 Feb 15;2(1):e000760. doi: 10.1136/bmjopen-2011-000760 (PMC3282291; doi:10.1136/bmjopen-2011-000760), 2012-02-15
Supplement: bmjopen-2011-000760.draft_revisions.pdf [file bmjopen-2011-000760.draft_revisions.pdf]

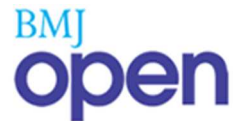

**Self-rated health and mortality in individuals with diabetes mellitus: prospective cohort study**

|                                 |                                                                                                                                                                                                                                                                                                                                                                                                                                                                                                                                                                                                                                                                                                                                                                                                                                                                                                                                                                                                                                                                                                                                                                            |
|---------------------------------|----------------------------------------------------------------------------------------------------------------------------------------------------------------------------------------------------------------------------------------------------------------------------------------------------------------------------------------------------------------------------------------------------------------------------------------------------------------------------------------------------------------------------------------------------------------------------------------------------------------------------------------------------------------------------------------------------------------------------------------------------------------------------------------------------------------------------------------------------------------------------------------------------------------------------------------------------------------------------------------------------------------------------------------------------------------------------------------------------------------------------------------------------------------------------|
| Journal:                        | <i>BMJ Open</i>                                                                                                                                                                                                                                                                                                                                                                                                                                                                                                                                                                                                                                                                                                                                                                                                                                                                                                                                                                                                                                                                                                                                                            |
| Manuscript ID:                  | bmjopen-2011-000760                                                                                                                                                                                                                                                                                                                                                                                                                                                                                                                                                                                                                                                                                                                                                                                                                                                                                                                                                                                                                                                                                                                                                        |
| Article Type:                   | Research                                                                                                                                                                                                                                                                                                                                                                                                                                                                                                                                                                                                                                                                                                                                                                                                                                                                                                                                                                                                                                                                                                                                                                   |
| Date Submitted by the Author:   | 13-Dec-2011                                                                                                                                                                                                                                                                                                                                                                                                                                                                                                                                                                                                                                                                                                                                                                                                                                                                                                                                                                                                                                                                                                                                                                |
| Complete List of Authors:       | Wennberg, Patrik; University of Umeå, Department of Public Health and Clinical Medicine<br>Rolandsson, Olov; Umeå University, Department of Public Health and Clinical Medicine, Family Medicine<br>Jerdén, Lars; Centre for Clinical Research Dalarna,<br>Boeing, Heiner; German Institute of Human Nutrition Potsdam-Rehbrücke, Department of Epidemiology<br>Sluik, Diewertje; German Institute of Human Nutrition Potsdam-Rehbrücke, Department of Epidemiology<br>Kaaks, Rudolf; German Cancer Research Centre, Division of Cancer Epidemiology<br>Teucher, Birgit; German Cancer Research Centre, Division of Cancer Epidemiology<br>Spijkerman, Annemieke; National Institute for Public Health and the Environment Centre for Prevention and Health Services Research,<br>de Mesquita, Bas; National Institute for Public Health and the Environment Centre for Prevention and Health Services Research,<br>Dethlefsen, Claus; Aalborg Sygehus, Kardiovaskulært Forskningscenter<br>Nilsson, Peter; University of Lund, Clinical Sciences<br>Nöthlings, Ute; Christian-Albrechts-University of Kiel, Institute for Experimental Medicine, Section for Epidemiology |
| <b>Primary Subject Heading</b>: | Diabetes and endocrinology                                                                                                                                                                                                                                                                                                                                                                                                                                                                                                                                                                                                                                                                                                                                                                                                                                                                                                                                                                                                                                                                                                                                                 |
| Secondary Subject Heading:      | General practice / Family practice, Patient-centred medicine                                                                                                                                                                                                                                                                                                                                                                                                                                                                                                                                                                                                                                                                                                                                                                                                                                                                                                                                                                                                                                                                                                               |
| Keywords:                       | General diabetes < DIABETES & ENDOCRINOLOGY, Diabetes & endocrinology < INTERNAL MEDICINE, PREVENTIVE MEDICINE, PRIMARY CARE                                                                                                                                                                                                                                                                                                                                                                                                                                                                                                                                                                                                                                                                                                                                                                                                                                                                                                                                                                                                                                               |
|                                 |                                                                                                                                                                                                                                                                                                                                                                                                                                                                                                                                                                                                                                                                                                                                                                                                                                                                                                                                                                                                                                                                                                                                                                            |

SCHOLARONE™  
Manuscripts

1  
2  
3 **Self-rated health and mortality in individuals with diabetes mellitus: prospective**  
4 **cohort study**  
5

6  
7  
8 Correspondence: Patrik Wennberg

9  
10 Fax: +46 90 776883, Telephone: +46 90 7851423

11  
12  
13 E-mail: patrik.wennberg@fammed.umu.se

14  
15  
16 Patrik Wennberg, *researcher*<sup>1</sup>, Olov Rolandsson, *associate professor*<sup>1</sup>, Lars Jerdén,  
17 *researcher*<sup>2</sup>, Heiner Boeing, *professor*<sup>3</sup>, Diewertje Sluik, *PhD student*<sup>3</sup>, Rudolf Kaaks,  
18 *professor*<sup>4</sup>, Birgit Teucher, *researcher*<sup>4</sup>, Annemieke Spijkerman, *researcher*<sup>5</sup>, Bas Bueno  
19 de Mesquita, *researcher*<sup>5</sup>, Claus Dethlefsen, *researcher*<sup>6</sup>, Peter M Nilsson, *professor*<sup>7</sup>, Ute  
20 Nöthlings, *professor*<sup>8</sup>  
21  
22  
23  
24

25  
26  
27 <sup>1</sup>Department of Public Health and Clinical Medicine, Family Medicine, Umeå University, SE-901 85  
28 Umeå, Sweden.

29 <sup>2</sup>Centre for Clinical Research Dalarna, Falun, Sweden

30  
31 <sup>3</sup>Department of Epidemiology, German Institute of Human Nutrition Potsdam-Rehbrücke, Nuthetal,  
32 Germany

33  
34 <sup>4</sup>Division of Cancer Epidemiology, German Cancer Research Centre, Heidelberg, Germany

35  
36 <sup>5</sup>National Institute for Public Health and the Environment Centre for Prevention and Health Services  
37 Research, Bilthoven, The Netherlands

38  
39 <sup>6</sup>Kardiovaskulært Forskningscenter, Aalborg Sygehus, Aalborg, Denmark

40  
41 <sup>7</sup>Department of Clinical Sciences, Lund University, University Hospital, Malmö, Sweden

42  
43 <sup>8</sup>Institute for Experimental Medicine, Section for Epidemiology, Christian-Albrechts-University of  
44 Kiel, Kiel, Germany

45  
46 Running title: Diabetes, self-rated health and mortality

47  
48  
49 *Key words:* Diabetes, self-rated health, mortality, prevention, cohort

50  
51  
52 Word count: 3074  
53  
54  
55  
56  
57  
58  
59  
60

1  
2  
3 "The Corresponding Author has the right to grant on behalf of all authors and  
4 does grant on behalf of all authors, an exclusive licence (or non-exclusive for  
5 government employees) on a worldwide basis to the BMJ Group and co-owners  
6 or contracting owning societies (where published by the BMJ Group on their  
7 behalf), and its Licensees to permit this article (if accepted) to be published in  
8 *BMJ Open* and any other BMJ Group products and to exploit all subsidiary rights,  
9 as set out in our licence."  
10  
11  
12  
13  
14  
15  
16  
17  
18  
19  
20  
21  
22  
23  
24  
25  
26  
27  
28  
29  
30  
31  
32  
33  
34  
35  
36  
37  
38  
39  
40  
41  
42  
43  
44  
45  
46  
47  
48  
49  
50  
51  
52  
53  
54  
55  
56  
57  
58  
59  
60

## Abstract

**Background** Self-rated health scores have shown to be predictors of vascular events and major complications in diabetes patients.

**Objective** To investigate whether low self-rated health is associated with increased mortality in patients with diabetes.

**Design** Self-rated health was assessed in self-administered questionnaires in 3,257 patients (mean  $\pm$  SD age was 55.8  $\pm$  7.6 years and 42% women) with confirmed diagnosis of diabetes mellitus. Enrolment took place between 1992 and 2000 in four centers (Bilthoven, Heidelberg, Potsdam, Umeå) in a sub-cohort nested in the European Prospective Investigation into Cancer and Nutrition. We used Cox proportional hazards modeling to estimate hazard ratios (HRs) for total mortality controlling for age, center, sex, educational level, BMI, physical inactivity, smoking, insulin treatment, hypertension, hyperlipidemia, history of myocardial infarction, stroke or cancer.

**Results** During follow-up (mean follow-up  $\pm$  SD was 8.6  $\pm$  2.3 years) 344 deaths (241 men/103 women) occurred. In a multivariate model, patients with low self-rated health were at higher risk of mortality (hazard ratio 1.38, 95% confidence interval 1.10 to 1.73) than patients with high self-rated health. The association was mainly driven by increased five-year mortality in men and was stronger among lean and normal-weight than obese patients. There was no indication of heterogeneity across centres.

**Conclusions** Low self-rated health was associated with increased mortality in patients with diabetes after controlling for established risk factors. In diabetes patients with low self-rated health, the physician should consider a more detailed consultation and intensified support.

## Article summary

### Article focus

- Is low self-rated health associated with increased mortality in diabetes patients?
- If so, is the association between self-rated health and mortality in diabetes patients moderated by socio-demographic and health-related variables?

### Key messages

- Low self-rated health was associated with increased mortality in patients with diabetes after controlling for established risk factors. The association was homogeneous across the four EPIC centres situated in three different European countries.
- The association between low self-rated health and mortality was mainly driven by increased five-year mortality in men and was stronger among lean and normal-weight patients than obese patients.

### Strength and limitations of this study

- To our knowledge, this is the first study that evaluates this research question in a population-based cohort of diabetes patients with long-term follow-up (up to a maximum of 14 years) in different European countries.
- The association between self-rated health and mortality remained robust after controlling for potential confounders including previous myocardial infarction, stroke or cancer, but we cannot rule out residual confounding from other co-morbidity that was not assessed at baseline.

## Introduction

Patients with diabetes have a 1.5–2.5-fold higher risk of death compared to a non-diabetic population.[1-4] The excess mortality in diabetes patients is mainly caused by a higher risk of cardiovascular (CVD) mortality,[3-4] but mortality due to cancer is also increased.[5] It is of great importance to identify diabetes patients with high risk of CVD morbidity and mortality early on in the disease process in order to intervene with medication and lifestyle changes.[6] Hence, risk engines[7] or risk scores[8] have been developed to identify the subjects at highest risk of developing CVD. None of these tools have utilized subjective measures of health.

Self-rated health (SRH) is a subjective measure of health usually defined by responses to a single question such as “How do you rate your health?” SRH has been associated with future health outcomes such as cardiovascular events[9] and mortality both in representative community samples[10] and in defined patient cohorts.[11-13] Although there is no consensus on what SRH really represents, SRH is drawing increasingly attention as a key parameter in health care, including health policy evaluation, population surveys and research.[14] Previous research in different populations has suggested that the predictive strength of SRH for subsequent mortality may differ by sex,[15] age,[16] race,[17] education level,[18] and experience of chronic disease.[19] Studies evaluating SRH among diabetes patients are scarce. One previous study showed that SRH predicted vascular events and major complications.[20]

The primary aim of this study was to investigate whether low self-rated health is associated with increased mortality in patients with diabetes. Prospective studies investigating this research question have been restricted to short-term mortality (up to four years), whereas we can present data from a study with a mean follow-up of 8.6 years. As a secondary aim we investigated whether socio-demographic and health-related variables moderate the association between SRH and mortality in this cohort of diabetes patients.

## Methods

### *Study population*

The study was nested in the European Prospective Investigation into Cancer and Nutrition (EPIC). EPIC is an ongoing cohort study, which consists of 519,978 men and women from ten European countries. A detailed description of the study design and methods can be found elsewhere.[21] Participants were 35 to 70 years at enrolment between 1992 and 2000 and were recruited predominantly from the general population residing in a given geographic area. Participants gave their written consent and the study was approved by the ethical review boards of the International Agency for Research on Cancer and by the review boards at the local centres where participants had been recruited for the EPIC study. Originally, the EPIC centres in Denmark, Germany, Italy, Spain, Sweden and the Netherlands contributed 7,048 cases of self-reported diabetes at baseline. Self-reports of diabetes obtained at baseline were confirmed by additional information sources, which include the following depending on the available options in the different countries: contact with a medical practitioner, use of diabetes-related medication (e.g. insulin and blood glucose lowering drugs), repeated self-report during follow-up, linkage to diabetes registries, or a measure of glycated haemoglobin (HbA1c) above 6%.[22] A total of 5,542 cases of diabetes mellitus could be confirmed. We also included 870 participants whose diabetes diagnosis was confirmed within another project in EPIC, leading to a sub-cohort of 6,412 individuals with confirmed diabetes at baseline.[23] For the current study, only EPIC study centres which could provide data on SRH were included (Germany: Heidelberg and Potsdam; the Netherlands: Bilthoven; Sweden: Umeå). For this reason, 3,155 participants (from the centres in Denmark, Italy and Spain) were excluded. The final dataset therefore comprised 3,257 participants from four EPIC study centres with a confirmed diagnosis of diabetes mellitus at baseline. No clear separation between type 1 and type 2 diabetes could be made.

### *Assessment of self-rated health*

SRH was assessed at baseline using self-administered questionnaires in the native language. The questionnaires were somewhat differently formulated at each centre and were therefore standardized (described in **Appendix**). Given the low frequency of responses in the extreme categories (n=316 in the highest and n=241 in the lowest), we dichotomized the SRH variable by combining the two highest categories (high SRH) and the two lowest categories (low SRH).

### *Covariates and outcome*

Weight and height were measured with participants not wearing shoes. Each participant's body weight was corrected for clothing worn during measurement in order to reduce heterogeneity due to protocol differences among centres.[24] Body mass index (BMI) was calculated after measurement of body weight and height, as weight (kilograms) divided by height (metres squared). For the blood pressure measurements, uniform procedures were recommended. Hypertension was defined by a hypertension diagnosis or use of hypertensive medication or blood pressure  $\geq 140/90$  mmHg. Further health-related variables were collected using questionnaires including questions on educational level, smoking status (current smoker versus non-smoker or ex-smoker), physical activity level, and medical history including history of myocardial infarction, stroke and cancer. Hyperlipidaemia was defined by use of medication for hyperlipidaemia.

Participants were followed from study entry until death, emigration, withdrawal, or end of follow-up period. Causes and dates of deaths were ascertained using record linkages with central cancer registries, death indexes or by follow-up mailings and subsequent inquiries to municipality registries, regional health departments, physicians or hospitals. Mortality data were coded following the 10th revision of the International Classification of Diseases, Injuries and Causes of Death (ICD-10). ICD-10 codes I00–I99 were used to calculate proportions of cardiovascular mortality. Hazard ratios were calculated for all-



1  
2  
3 cause mortality only, since we did not have statistical power for analyses of specified  
4 mortality.  
5

### 6 7 *Statistical analyses*

8  
9  
10 Chi-square test was used for testing proportions in categorical variables. Kruskal-Wallis  
11 test was used for significance testing in continuous variables. Hazard ratios (HRs) and  
12 95% confidence intervals (CI) were estimated using Cox proportional hazards models.  
13  
14 Age was used as the primary time variable, with entry time defined as the subject's age  
15 in years at recruitment and exit time defined as the subject's age in years at death or  
16 censoring. Multivariate models were constructed to determine HRs adjusted for  
17 covariates. Age, centre, sex, BMI, physical inactivity, insulin treatment, hypertension and  
18 history of myocardial infarction, stroke or cancer were tested as covariates and included  
19 in the multivariate model since they met the criteria of being significantly associated with  
20 both SRH and mortality during follow-up in men or in women. Given the low frequencies  
21 of previous myocardial infarction, stroke and cancer, these covariates were combined in  
22 one variable in the multivariate analysis to ensure a good model fit. Interaction was  
23 tested by including interaction terms in the Cox proportional hazards analysis. The  
24 hazard ratios were combined across centres using random effects meta-analysis, and  $I^2$  –  
25 the percentage of variation between centres due to real heterogeneity – was calculated.  
26 The first sensitivity analysis was performed to see if the strength of the association  
27 between SRH and mortality differed for short-term mortality and long-term mortality. For  
28 this reason we dichotomized the decedents in two categories, participants who died  
29 before the median follow-up time (5.4 years) and participants who died after the median  
30 follow-up time. The second sensitivity analysis was performed by excluding participants  
31 with low weight ( $BMI \leq 20$ ). A *P*-value under 0.05 was considered significant. All analyses  
32 were performed using SPSS Statistics 19.0 except for the  $I^2$  index test which was  
33 performed using Comprehensive Meta-Analysis version 2.  
34  
35  
36  
37  
38  
39  
40  
41  
42  
43  
44  
45  
46  
47  
48  
49  
50  
51  
52  
53  
54  
55  
56  
57  
58  
59  
60

### *Missing values*

There was no information on history of stroke and cancer from the centre in Umeå (n=427) and these missing values were assigned to a separate category in multivariate analysis. The proportions of missing values for other variables were all less than 2.5% and coded as missing in multivariate analysis. Consequently, 85 persons including eight decedents were lost in the multivariate analysis.

### **Results**

The mean follow-up time was 8.6 years ( $\pm$  2.3). Baseline characteristics for the 1,903 men and 1,354 women are presented in **Table 1**. Mean age at baseline was 56.2 years ( $\pm$  7.1) for men and 55.4 years ( $\pm$  8.2) for women. Among the 3,257 persons included in the study there were 241 deaths (13%) in men and 103 deaths (8%) in women. Of the 344 persons who died, 40% were cardiovascular deaths, 52% were non-cardiovascular deaths and in 8% the cause of death was unknown.

**Table 2** shows the baseline characteristics in relation to categories of SRH. Persons with low SRH were younger, more frequently women, had higher BMI and had more frequently a history of myocardial infarction or stroke compared to persons with high SRH. Moreover, in men with low SRH, insulin treatment was more common and in women with low SRH, hypertension and a history of cancer were more common.

In a model adjusted for age and centre, low SRH was associated with increased mortality (**Table 3**). In sex-specific analyses, this association was significant in men but not in women. After further adjustments for potential confounders, the association between low SRH and mortality was attenuated but remained significant in men and in both sexes combined. The fully adjusted HR for both sexes was 1.38 (95% confidence interval 1.10 to 1.73). In a sensitivity analyses we calculated HRs for low SRH for short-term mortality (participants who died before median follow-up time among the

1  
2  
3 decedents, 5.4 years) and long-term mortality (participants who died after median  
4 follow-up time among the decedents). HR of low SRH for short-term mortality was 1.89  
5 (1.31 to 2.73) for men and 1.23 (0.68 to 2.22) for women in the fully adjusted model.  
6  
7  
8 HR of low SRH for long-term mortality was 1.20 (0.81 to 1.77) for men and 1.03 (0.57 to  
9 1.87) for women in the same multivariate model.  
10  
11

12  
13  
14 Interaction analyses were performed between SRH and covariates in relation to  
15 mortality. We found a significant interaction between SRH and BMI with  $P_{\text{interaction}}$  value  
16 0.03. When analysing HRs for SRH in different strata of BMI we found stronger  
17 associations between SRH and mortality at lower levels of BMI, indicating an  
18 antagonistic interaction (**Table 4**). For example, fully adjusted HR for both sexes  
19 combined in the 1st tertile of BMI was 1.89 (1.27 to 2.82), compared to 1.06 (0.72 to  
20 1.54) in the 3rd tertile. Consequently, we performed a second sensitivity analysis by  
21 excluding persons with low weight ( $\text{BMI} \leq 20$ , 43 persons) from the main analysis of SRH  
22 and mortality, which attenuated the fully adjusted HR from 1.38 to 1.35 (1.08 to 1.70)  
23 in both sexes combined. We found no statistical interaction between SRH and sex  
24 ( $P_{\text{interaction}}$  value 0.30), age ( $P_{\text{interaction}}$  value 0.22), education level ( $P_{\text{interaction}}$  value 0.14),  
25 smoking ( $P_{\text{interaction}}$  value 0.13), physical inactivity ( $P_{\text{interaction}}$  value 0.24), insulin  
26 treatment ( $P_{\text{interaction}}$  value 0.18), hypertension ( $P_{\text{interaction}}$  value 0.23), hyperlipidaemia  
27 ( $P_{\text{interaction}}$  value 0.16) and history of myocardial infarction, stroke or cancer ( $P_{\text{interaction}}$   
28 value 0.29).  
29  
30  
31  
32  
33  
34  
35  
36  
37  
38  
39  
40  
41  
42  
43  
44  
45

46 **Figure 1** shows a forest plot with adjusted HRs for low SRH by sex and in both sexes  
47 combined for each centre. We found no clear indication of heterogeneity in the  
48 association between SRH and mortality across centres ( $I^2$  index=0).  
49  
50  
51

## 52 53 Discussion

54  
55 We found that low SRH was associated with an increased risk of mortality in diabetes  
56 patients after adjusting for major established risk factors. This association was  
57  
58  
59  
60

1  
2  
3 homogeneous across the four EPIC centres situated in three different European countries.  
4  
5 The strength of the association between SRH and mortality in this study was similar to  
6  
7 results in general populations.[25] In sex-specific analyses we found that the association  
8  
9 between SRH and mortality was significant in men but not in women. However, the HR in  
10  
11 women pointed in the same direction as in men, and we cannot rule out that the lack of  
12  
13 significance was due to the lower statistical power to detect an association in women.  
14  
15 Interestingly, the association between SRH and mortality was stronger among lean and  
16  
17 normal-weight patients than among obese patients in both men and women. This finding  
18  
19 could possibly be explained by the presence of other chronic diseases leading to low body  
20  
21 weight, low SRH and higher risk of premature death. However, the association between  
22  
23 low SRH and mortality remained significant even after the exclusion of persons with  
24  
25  $BMI \leq 20$ . Therefore, there are likely other factors contributing to the weaker association  
26  
27 between SRH and overall mortality in obese diabetes patients. First, we found that the  
28  
29 proportion of cardiovascular mortality was highest in the tertile with the highest BMI in  
30  
31 both men and women, suggesting that the mortality pattern may be different at  
32  
33 different levels of BMI. Previous research has shown that the link between SRH and  
34  
35 mortality may be weaker for cardiovascular mortality than for cancer mortality or  
36  
37 mortality from other causes.[26] Second, we found that the obese diabetes patients  
38  
39 rated their health lower than patients with normal weight, which is in line with studies  
40  
41 on general populations.[27] Previous studies have shown that obese patients may  
42  
43 experience discrimination, stigmatization and major limitations in daily life linked to their  
44  
45 obesity.[28-29] These factors will likely have a considerable impact on their health  
46  
47 perception. We hypothesize that these factors related to obesity may overshadow other  
48  
49 important health problems or health behaviours in the perception of health and possibly  
50  
51 weaken the association between SRH and mortality in obese patients.

52  
53  
54 The association between SRH and mortality has been of interest in medical research for  
55  
56 several decades. Already in 1973, Maddox, one of the pioneers in this research field  
57  
58 stated that SRH "clearly measure something more—and something less—than objective  
59  
60

1  
2  
3 medical ratings".[30] It is still debated what information individuals rely on when rating  
4 their health. Qualitative research has suggested that SRH reflects a combination of  
5 specific health problems, general physical functioning and health behaviours.[31] Cultural  
6 differences may also have an impact on SRH, even within Europe.[32] A previous  
7 quantitative study from NHANES found that low SRH is particularly predictive for  
8 respondents with self-reported history of circulatory system diagnoses and perception of  
9 symptoms, but not for respondents without symptoms or diagnoses.[19]  
10  
11  
12  
13  
14  
15  
16  
17

18 Only a few studies have evaluated the association between SRH and mortality in well-  
19 defined cohorts of diabetes patients.[33-35] In 1994, Dasbach and colleagues found  
20 increased mortality in 987 patients with older onset of diabetes who rated their health  
21 as worse than other people of similar age. The average age in their study was 64.7  
22 years ( $\pm 11.0$ ) compared to 55.8 years ( $\pm 7.6$ ) in our study. More recently, McEwen and  
23 co-workers found that SRH predicted mortality in an American multi-ethnic cohort of  
24 over 7,000 diabetes patients.[34] However, their study was restricted to patients with  
25 longer duration of diabetes (diagnosed at least 18 months before survey) in managed  
26 care and a relatively short follow-up (the average length was 3.7 years). In the FIELD  
27 study, a controlled trial of fenofibrate performed in Australia, New Zealand and Finland,  
28 the mean duration of follow-up was even shorter, only 2.4 years. In this study involving  
29 7348 diabetes patients, Clarke and colleagues found that low SRH was associated with  
30 vascular events, diabetes complications and all-cause mortality.[33] In our study, which  
31 was population-based, the participants were younger and followed for an average of 8.6  
32 years. We found that the association between SRH and mortality was weaker and no  
33 longer statistically significant when we restricted the analysis to long-term mortality.  
34 These findings raise questions about the long-term predictiveness of a single self-rating  
35 of health and we therefore suggest that future research in diabetes patients should  
36 include repeated self-ratings and follow-up for long-term mortality.  
37  
38  
39  
40  
41  
42  
43  
44  
45  
46  
47  
48  
49  
50  
51  
52  
53  
54  
55  
56  
57  
58  
59  
60

1  
2  
3 There are some limitations to our study. Even if the association between SRH and  
4 mortality was robust when individuals with low BMI were excluded, we cannot rule out  
5 other potential residual confounding from co-morbidity other than MI, stroke or cancer  
6 that was not assessed at baseline health examinations. Moreover, the sample size in the  
7 present study did not allow any clear conclusions in relation to sex-specific analyses. The  
8 questions and the response alternatives on SRH were formulated somewhat differently  
9 and in the native language at each centre. The questions and answers were translated  
10 and standardized in four response alternatives, which may have led to some degree of  
11 misclassification, particularly for the centres in Bilthoven and Umeå (which had five  
12 response alternatives). However, the forest plot gave no indication that the  
13 standardization in four response alternatives had a major impact on the risk estimates.  
14 The multivariate models used in this study were similar but not identical with equations  
15 used in risk engines[7] and risk scores.[8] Whether SRH adds predictive value over and  
16 above these models needs to be further analysed in future studies using adequate  
17 methods.[36]

18  
19  
20  
21  
22  
23  
24 Although more research is needed to gain a more complete understanding of the  
25 relationship between SRH and mortality in diabetes patients, we find that self-ratings of  
26 health are an inexpensive and time-efficient way to obtain subjective prognostic  
27 information that may be difficult to assess by objective health measurements. In  
28 diabetes patients with low SRH the physician should consider a more detailed  
29 consultation and intensified support.

### 30 31 32 33 34 35 36 37 38 39 40 41 42 43 44 45 46 47 48 *Conclusions*

49 This is the first study investigating the association between self-rated health and  
50 mortality in diabetes patients with a long-term follow-up in different European countries.  
51 We found that low self-rated health was associated with increased mortality in patients  
52 with diabetes after controlling for established risk factors. The association was mainly  
53  
54  
55  
56  
57  
58  
59  
60

1  
2  
3 driven by increased five-year mortality in men and was stronger among lean and  
4  
5 normal-weight patients than obese patients.  
6  
7  
8  
9  
10  
11  
12  
13  
14  
15  
16  
17  
18  
19  
20  
21  
22  
23  
24  
25  
26  
27  
28  
29  
30  
31  
32  
33  
34  
35  
36  
37  
38  
39  
40  
41  
42  
43  
44  
45  
46  
47  
48  
49  
50  
51  
52  
53  
54  
55  
56  
57  
58  
59  
60

For peer review only

**Table 1** Baseline characteristics of 3257 diabetes patients participating in the European Prospective Investigation into Cancer and Nutrition. Data are presented as percent or mean (standard deviation).

|                                         | <b>Men</b><br>N=1903 | <b>Women</b><br>N=1354 |
|-----------------------------------------|----------------------|------------------------|
| Age (years)                             | 56.2 (7.1)           | 55.4 (8.2)             |
| Self-rated health (%)                   |                      |                        |
| High                                    |                      |                        |
| <i>Excellent</i>                        | 10.5                 | 8.6                    |
| <i>Good</i>                             | 54.1                 | 49.9                   |
| Low                                     |                      |                        |
| <i>Moderate</i>                         | 28.4                 | 33.5                   |
| <i>Poor</i>                             | 7.0                  | 8.0                    |
| Education (%)                           |                      |                        |
| <i>None</i>                             | 0.6                  | 1.8                    |
| <i>Primary school</i>                   | 35.0                 | 43.9                   |
| <i>Technical/professional school</i>    | 29.1                 | 33.7                   |
| <i>Secondary school</i>                 | 6.8                  | 7.6                    |
| <i>Longer (incl. university degree)</i> | 28.6                 | 13.1                   |
| BMI (kg/m <sup>2</sup> )                | 28.6 (4.3)           | 29.5 (5.6)             |
| Current smoking (%)                     | 24.0                 | 16.2                   |
| Physical inactivity (%)                 | 26.8                 | 33.0                   |
| Insulin treatment (%)                   | 22.8                 | 24.3                   |
| Hypertension (%)                        | 70.0                 | 71.3                   |
| Hyperlipidaemia (%)                     | 21.8                 | 18.5                   |
| History of myocardial infarction (%)    | 9.2                  | 3.8                    |
| History of stroke (%)                   | 3.5                  | 3.0                    |
| History of cancer (%)                   | 4.1                  | 6.4                    |



**Table 2** Baseline characteristics in relation to categories of self-rated health. Data are presented as percent or mean.

|                                             | Men               |                 |             |                  |             | Women             |             |      |      |        |
|---------------------------------------------|-------------------|-----------------|-------------|------------------|-------------|-------------------|-------------|------|------|--------|
|                                             | Self-rated health |                 |             |                  | P           | Self-rated health |             |      |      | P      |
|                                             | High              | Low             |             |                  |             | High              | Low         |      |      |        |
| <i>Excellent</i>                            | <i>Good</i>       | <i>Moderate</i> | <i>Poor</i> | <i>Excellent</i> | <i>Good</i> | <i>Moderate</i>   | <i>Poor</i> |      |      |        |
| Age (years)                                 | 57.1              | 56.6            | 55.2        | 55.4             | <0.001      | 53.8              | 55.8        | 55.4 | 54.1 | 0.001  |
| Education (%)                               |                   |                 |             |                  |             |                   |             |      |      |        |
| <i>None</i>                                 | 0.5               | 0.5             | 0.7         | 0.8              | 0.42        | 1.7               | 1.5         | 2.0  | 2.9  | 0.40   |
| <i>Primary school</i>                       | 35.9              | 33.1            | 36.8        | 42.4             |             | 35.3              | 44.6        | 44.5 | 44.8 |        |
| <i>Technical/<br/>professional school</i>   | 31.8              | 28.4            | 29.3        | 28.8             |             | 41.4              | 33.2        | 32.3 | 34.3 |        |
| <i>Secondary school</i>                     | 6.6               | 6.7             | 7.5         | 4.5              |             | 8.6               | 6.3         | 9.8  | 5.7  |        |
| <i>Longer (incl.<br/>university degree)</i> | 25.3              | 31.3            | 25.7        | 23.5             |             | 12.9              | 14.5        | 11.4 | 12.4 |        |
| BMI (kg/m <sup>2</sup> )                    | 28.6              | 28.4            | 28.9        | 29.0             | 0.05        | 28.1              | 29.2        | 30.0 | 31.1 | <0.001 |
| Current smoking (%)                         | 25.5              | 23.4            | 24.8        | 23.7             | 0.89        | 16.4              | 15.6        | 15.4 | 21.3 | 0.49   |
| Physical inactivity (%)                     | 20.6              | 26.3            | 26.6        | 41.1             | 0.001       | 18.3              | 32.8        | 35.8 | 39.8 | 0.002  |
| Insulin treatment (%)                       | 15.2              | 20.8            | 27.4        | 29.2             | 0.002       | 18.1              | 23.0        | 28.0 | 24.1 | 0.15   |
| Hypertension (%)                            | 67.5              | 68.5            | 74.0        | 70.7             | 0.11        | 56.9              | 72.4        | 72.3 | 75.0 | 0.004  |
| Hyperlipidaemia (%)                         | 22.0              | 20.4            | 24.1        | 21.8             | 0.42        | 14.7              | 18.6        | 19.0 | 20.4 | 0.69   |
| History of myocardial infarction (%)        | 9.0               | 6.9             | 11.5        | 17.3             | <0.001      | 1.7               | 2.4         | 6.0  | 4.6  | 0.009  |
| History of stroke (%)                       | 2.8               | 2.4             | 4.5         | 9.5              | 0.001       | 1.0               | 2.1         | 4.7  | 3.3  | 0.07   |
| History of cancer (%)                       | 5.1               | 5.1             | 3.6         | 5.7              | 0.61        | 4.9               | 5.8         | 6.1  | 14.3 | 0.02   |

**Table 3** Hazard ratios (HRs) of low (moderate or poor) versus high (excellent or good) self-rated health for all-cause mortality during follow-up.

|            | Model 1*            | Model 2†            | Model 3‡            |
|------------|---------------------|---------------------|---------------------|
|            | HR (95% CI)         | HR (95% CI)         | HR (95% CI)         |
| Both sexes | 1.56 (1.25 to 1.94) | 1.49 (1.19 to 1.86) | 1.38 (1.10 to 1.73) |
| Men        | 1.75 (1.35 to 2.27) | 1.63 (1.25 to 2.12) | 1.52 (1.16 to 1.98) |
| Women      | 1.35 (0.90 to 2.03) | 1.21 (0.80 to 1.83) | 1.11 (0.73 to 1.69) |

\*Adjusted for age and centre.

†Adjusted for age, centre, sex, BMI, physical inactivity, insulin treatment and hypertension.

‡Adjusted for age, centre, sex, BMI, physical inactivity, insulin treatment, hypertension and history of myocardial infarction, stroke or cancer.

**Table 4** Hazard ratios (HRs) of low versus high self-rated health for all-cause mortality by tertiles of body mass index.

|            |                    | BMI                  | CV               | Model 1*            | Model 2†            | Model 3‡            |
|------------|--------------------|----------------------|------------------|---------------------|---------------------|---------------------|
|            |                    | (kg/m <sup>2</sup> ) | mortality<br>(%) | HR (95% CI)         | HR (95% CI)         | HR (95% CI)         |
| Both sexes | <i>1st tertile</i> | <26.73               | 41.3             | 2.10 (1.42 to 3.10) | 2.09 (1.41 to 3.10) | 1.89 (1.27 to 2.82) |
|            | <i>2nd tertile</i> | 26.73-30.49          | 33.3             | 1.54 (1.05 to 2.25) | 1.38 (0.93 to 2.05) | 1.24 (0.83 to 1.86) |
|            | <i>3rd tertile</i> | >30.49               | 46.0             | 1.18 (0.82 to 1.71) | 1.10 (0.76 to 1.61) | 1.06 (0.72 to 1.54) |
| Men        | <i>1st tertile</i> | <26.64               | 42.9             | 2.11 (1.33 to 3.35) | 2.19 (1.38 to 3.47) | 2.06 (1.30 to 3.27) |
|            | <i>2nd tertile</i> | 26.64-29.90          | 35.8             | 1.55 (0.99 to 2.42) | 1.39 (0.87 to 2.22) | 1.25 (0.78 to 2.00) |
|            | <i>3rd tertile</i> | >29.90               | 47.0             | 1.68 (1.08 to 2.63) | 1.48 (0.94 to 2.32) | 1.41 (0.90 to 2.23) |
| Women      | <i>1st tertile</i> | <26.88               | 36.7             | 2.57 (1.19 to 5.58) | 2.18 (0.97 to 4.89) | 1.60 (0.70 to 3.64) |
|            | <i>2nd tertile</i> | 26.88-31.36          | 32.1             | 1.03 (0.47 to 2.27) | 0.81 (0.34 to 1.90) | 0.79 (0.33 to 1.87) |
|            | <i>3rd tertile</i> | >31.36               | 40.0             | 0.92 (0.50 to 1.70) | 0.85 (0.45 to 1.60) | 0.82 (0.43 to 1.56) |

CV= Cardiovascular

\*Adjusted for age and centre.

†Adjusted for age, centre, sex, BMI, physical inactivity, insulin treatment and hypertension.

‡Adjusted for age, centre, sex, BMI, physical inactivity, insulin treatment, hypertension and history of myocardial infarction, stroke or cancer.

**Footnotes**

Contributors: PW, OR, and UN were involved in the study concept and planned the analyses. PW, OR, HB, DS, RK, BT, AS, BBN, and UN contributed in the acquisition of the data. PW was responsible for statistical analyses and drafted the paper. PW, OR, LJ, and UN interpreted the results. All authors participated in critical revision of the manuscript. PW is the guarantor.

Funding: This study was supported by a European Foundation for the Study of Diabetes / Sanofi-Aventis grant. The European Foundation for the Study of Diabetes or Sanofi-Aventis had no role in the design or conduct of the study, collection or analysis of the data, or preparation or approval of the manuscript and did not have any influence on the contents.

Competing interests: All authors have completed the Unified Competing Interest form at [www.icmje.org/coi\\_disclosure.pdf](http://www.icmje.org/coi_disclosure.pdf) (available on request from the corresponding author) and declare: no support from any organisation for the submitted work; no financial relationships with any organisations that might have an interest in the submitted work in the previous 3 years; no other relationships or activities that could appear to have influenced the submitted work.

Ethical approval: The study was approved by the IARC Institutional Review Board.

Data sharing: No additional data available.

## References

1. Hansen LJ, Olivarius Nde F, Siersma V. 16-year excess all-cause mortality of newly diagnosed type 2 diabetic patients: a cohort study. *BMC Public Health* 2009;**9**:400.
2. Mulnier HE, Seaman HE, Raleigh VS, Soedamah-Muthu SS, Colhoun HM, Lawrenson RA. Mortality in people with type 2 diabetes in the UK. *Diabet. Med.* 2006;**23**(5):516-21.
3. Gregg EW, Gu Q, Cheng YJ, Narayan KM, Cowie CC. Mortality trends in men and women with diabetes, 1971 to 2000. *Ann Intern Med* 2007;**147**(3):149-55.
4. de Grauw WJ, van de Lisdonk EH, van den Hoogen HJ, van Weel C. Cardiovascular morbidity and mortality in type 2 diabetic patients: a 22-year historical cohort study in Dutch general practice. *Diabet Med* 1995;**12**(2):117-22.
5. Vigneri P, Frasca F, Sciacca L, Pandini G, Vigneri R. Diabetes and cancer. *Endocr Relat Cancer* 2009;**16**(4):1103-23.
6. Effect of intensive blood-glucose control with metformin on complications in overweight patients with type 2 diabetes (UKPDS 34). UK Prospective Diabetes Study (UKPDS) Group. *Lancet* 1998;**352**(9131):854-65.
7. Stevens RJ, Kothari V, Adler AI, Stratton IM. The UKPDS risk engine: a model for the risk of coronary heart disease in Type II diabetes (UKPDS 56). *Clin Sci (Lond)* 2001;**101**(6):671-9.
8. Lloyd-Jones DM, Wilson PW, Larson MG, et al. Framingham risk score and prediction of lifetime risk for coronary heart disease. *Am J Cardiol* 2004;**94**(1):20-4.
9. May M, Lawlor DA, Brindle P, Patel R, Ebrahim S. Cardiovascular disease risk assessment in older women: can we improve on Framingham? British Women's Heart and Health prospective cohort study. *Heart* 2006;**92**(10):1396-401.
10. Idler EL, Benyamini Y. Self-rated health and mortality: a review of twenty-seven community studies. *J. Health Soc. Behav.* 1997;**38**(1):21-37.
11. Bosworth HB, Siegler IC, Brummett BH, et al. The association between self-rated health and mortality in a well-characterized sample of coronary artery disease patients. *Med Care* 1999;**37**(12):1226-36.
12. Walker JD, Maxwell CJ, Hogan DB, Ebly EM. Does self-rated health predict survival in older persons with cognitive impairment? *J Am Geriatr Soc* 2004;**52**(11):1895-900.
13. Gerber Y, Benyamini Y, Goldbourt U, Drory Y. Prognostic importance and long-term determinants of self-rated health after initial acute myocardial infarction. *Med Care* 2009;**47**(3):342-9.
14. Vadla D, Bozikov J, Akerstrom B, et al. Differences in healthcare service utilisation in elderly, registered in eight districts of five European countries. *Scand J Public Health* 2011;**39**(3):272-9.
15. Deeg DJ, Kriegsman DM. Concepts of self-rated health: specifying the gender difference in mortality risk. *Gerontologist* 2003;**43**(3):376-86; discussion 72-5.
16. Benyamini Y, Blumstein T, Lusky A, Modan B. Gender differences in the self-rated health-mortality association: is it poor self-rated health that predicts mortality or excellent self-rated health that predicts survival? *Gerontologist* 2003;**43**(3):396-405; discussion 372-5.
17. Lee SJ, Moody-Ayers SY, Landefeld CS, et al. The relationship between self-rated health and mortality in older black and white Americans. *J Am Geriatr Soc* 2007;**55**(10):1624-9.
18. Dowd JB, Zajacova A. Does the predictive power of self-rated health for subsequent mortality risk vary by socioeconomic status in the US? *Int J Epidemiol* 2007;**36**(6):1214-21.
19. Idler E, Leventhal H, McLaughlin J, Leventhal E. In sickness but not in health: self-ratings, identity, and mortality. *J. Health Soc. Behav.* 2004;**45**(3):336-56.
20. Hayes AJ, Clarke PM, Glasziou PG, Simes RJ, Drury PL, Keech AC. Can self-rated health scores be used for risk prediction in patients with type 2 diabetes? *Diabetes Care* 2008;**31**(4):795-7.
21. Ferrari P, Slimani N, Ciampi A, et al. Evaluation of under- and overreporting of energy intake in the 24-hour diet recalls in the European Prospective Investigation into Cancer and Nutrition (EPIC). *Public Health Nutr* 2002;**5**(6B):1329-45.

- 1
- 2
- 3 22. Sluik D, Boeing H, Montonen J, et al. Associations Between General and Abdominal Adiposity and
- 4 Mortality in Individuals With Diabetes Mellitus. *Am J Epidemiol* 2011.
- 5 23. Nothlings U, Boeing H, Maskarinec G, et al. Food intake of individuals with and without diabetes
- 6 across different countries and ethnic groups. *Eur. J. Clin. Nutr.* 2011;**65**(5):635-41.
- 7 24. Pischon T, Boeing H, Hoffmann K, et al. General and abdominal adiposity and risk of death in
- 8 Europe. *N Engl J Med* 2008;**359**(20):2105-20.
- 9 25. DeSalvo KB, Bloser N, Reynolds K, He J, Muntner P. Mortality prediction with a single general self-
- 10 rated health question. A meta-analysis. *J Gen Intern Med* 2006;**21**(3):267-75.
- 11 26. Pijls LT, Feskens EJ, Kromhout D. Self-rated health, mortality, and chronic diseases in elderly men.
- 12 The Zutphen Study, 1985-1990. *Am J Epidemiol* 1993;**138**(10):840-8.
- 13 27. Prosper MH, Moczulski VL, Qureshi A. Obesity as a predictor of self-rated health. *Am J Health*
- 14 *Behav* 2009;**33**(3):319-29.
- 15 28. Larsson U, Karlsson J, Sullivan M. Impact of overweight and obesity on health-related quality of
- 16 life--a Swedish population study. *Int J Obes Relat Metab Disord* 2002;**26**(3):417-24.
- 17 29. Thomas SL, Hyde J, Karunaratne A, Herbert D, Komesaroff PA. Being 'fat' in today's world: a
- 18 qualitative study of the lived experiences of people with obesity in Australia. *Health Expect*
- 19 *2008;11*(4):321-30.
- 20 30. Maddox GL, Douglass EB. Self-assessment of health: a longitudinal study of elderly subjects. *J.*
- 21 *Health Soc. Behav.* 1973;**14**(1):87-93.
- 22 31. Krause NM, Jay GM. What do global self-rated health items measure? *Med Care* 1994;**32**(9):930-
- 23 42.
- 24 32. Jylha M, Guralnik JM, Ferrucci L, Jokela J, Heikkinen E. Is self-rated health comparable across
- 25 cultures and genders? *J Gerontol B Psychol Sci Soc Sci* 1998;**53**(3):S144-52.
- 26 33. Clarke PM, Hayes AJ, Glasziou PG, Scott R, Simes J, Keech AC. Using the EQ-5D index score as a
- 27 predictor of outcomes in patients with type 2 diabetes. *Med. Care* 2009;**47**(1):61-8.
- 28 34. McEwen LN, Kim C, Haan MN, et al. Are health-related quality-of-life and self-rated health
- 29 associated with mortality? Insights from Translating Research Into Action for Diabetes (TRIAD). *Prim*
- 30 *Care Diabetes* 2009;**3**(1):37-42.
- 31 35. Dasbach EJ, Klein R, Klein BE, Moss SE. Self-rated health and mortality in people with diabetes.
- 32 *Am J Public Health* 1994;**84**(11):1775-9.
- 33 36. Pencina MJ, D'Agostino RB, Sr., D'Agostino RB, Jr., Vasan RS. Evaluating the added predictive
- 34 ability of a new marker: from area under the ROC curve to reclassification and beyond. *Stat. Med.*
- 35 *2008;27*(2):157-72; discussion 207-12.
- 36
- 37
- 38
- 39
- 40
- 41
- 42
- 43
- 44
- 45
- 46
- 47
- 48
- 49
- 50
- 51
- 52
- 53
- 54
- 55
- 56
- 57
- 58
- 59
- 60

### Figure legends

**Figure 1** Forest plot showing adjusted hazard ratios and 95% confidence intervals for the centres included in the study investigating the association between low self-rated health and mortality in patients with diabetes.

For peer review only

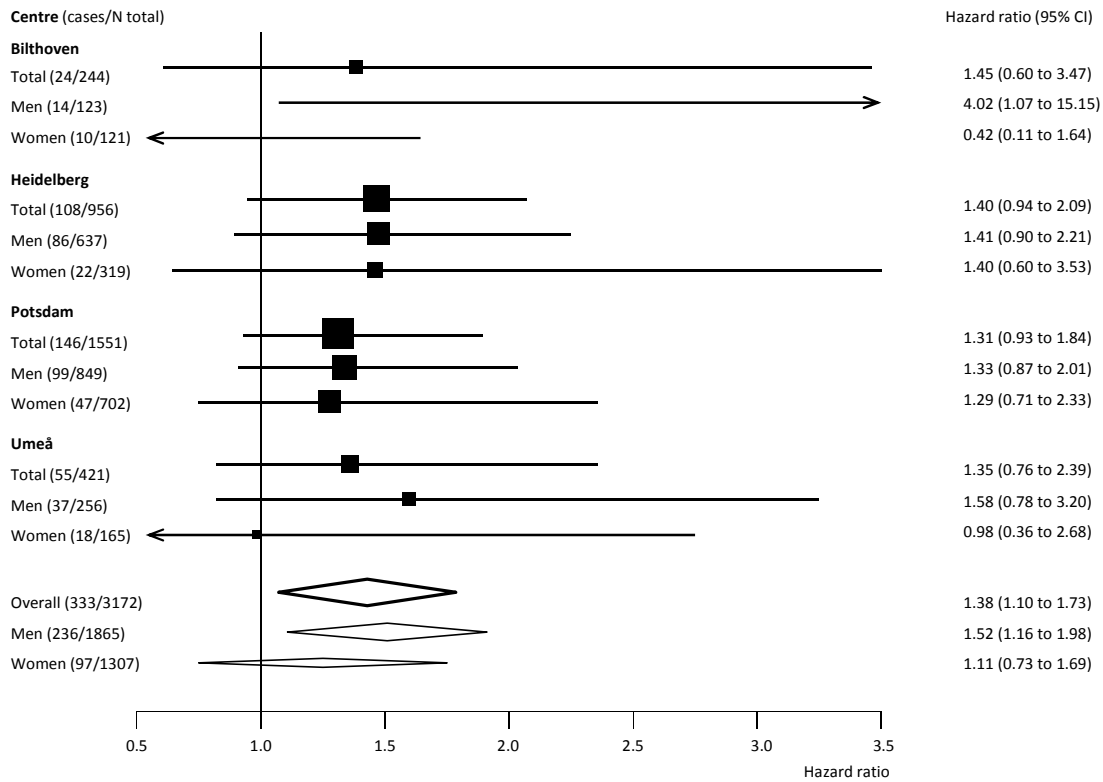

Review only



## Appendix

All questionnaires were standardized to fit the question (with four response alternatives):

*How satisfied are you today with your health?*

1 Excellent

2 Good

3 Moderate

4 Poor

Description of the original questions and how they were standardized:

Bilthoven 1993–94

Question: *What do you think about your health in general?*

| Response alternatives          | Standardized  |
|--------------------------------|---------------|
| 1 Excellent                    | 1 Excellent   |
| 2 Good                         | 2 Good        |
| 3 Reasonable                   | 3 Moderate    |
| 4 Mediocre                     | 4 Poor        |
| 5 Poor                         | 4 Poor        |
| 9 More than 1 option indicated | Missing value |

Bilthoven 1995–97

Question: *What do you think about your health in general?*

| Response alternatives          | Standardized  |
|--------------------------------|---------------|
| 1 Excellent                    | 1 Excellent   |
| 2 Very Good                    | 2 Good        |
| 3 Good                         | 2 Good        |
| 4 Reasonable                   | 3 Moderate    |
| 5 Mediocre                     | 4 Poor        |
| 9 More than 1 option indicated | Missing value |

Heidelberg

Question: *On the whole, how satisfied are you today with your health?*

| Response alternatives | Standardized  |
|-----------------------|---------------|
| 1 Very satisfied      | 1 Excellent   |
| 2 More satisfied      | 2 Good        |
| 3 More dissatisfied   | 3 Moderate    |
| 4 Very dissatisfied   | 4 Poor        |
| 8 Do not know         | Missing value |

Potsdam

Question: *On the whole, how satisfied are you today with your health?*

| Response alternatives      | Standardized  |
|----------------------------|---------------|
| 1 Very satisfied           | 1 Excellent   |
| 2 More likely satisfied    | 2 Good        |
| 3 More likely dissatisfied | 3 Moderate    |
| 4 Very dissatisfied        | 4 Poor        |
| 8 Do not know              | Missing value |

Umeå

Question: *How do you judge that your state of health has been in the last year?*

| Response alternatives | Standardized  |
|-----------------------|---------------|
| 1 Very well           | 1 Excellent   |
| 2 Quiet well          | 2 Good        |
| 3 Fairly well         | 3 Moderate    |
| 4 Quiet bad           | 4 Poor        |
| 5 Bad                 | 4 Poor        |
| 9 Inconsistent answer | Missing value |

## Research checklist

STROBE Statement—Checklist of items that should be included in reports of *cohort studies*

|                              | Item No | Recommendation                                                                                                                                                                                                                                                                                                         |
|------------------------------|---------|------------------------------------------------------------------------------------------------------------------------------------------------------------------------------------------------------------------------------------------------------------------------------------------------------------------------|
| <b>Title and abstract</b>    | 1       | (a) Indicate the study's design with a commonly used term in the title or the abstract<br>(b) Provide in the abstract an informative and balanced summary of what was done and what was found                                                                                                                          |
| <b>Introduction</b>          |         |                                                                                                                                                                                                                                                                                                                        |
| Background/rationale         | 2       | Explain the scientific background and rationale for the investigation being reported                                                                                                                                                                                                                                   |
| Objectives                   | 3       | State specific objectives, including any prespecified hypotheses                                                                                                                                                                                                                                                       |
| <b>Methods</b>               |         |                                                                                                                                                                                                                                                                                                                        |
| Study design                 | 4       | Present key elements of study design early in the paper                                                                                                                                                                                                                                                                |
| Setting                      | 5       | Describe the setting, locations, and relevant dates, including periods of recruitment, exposure, follow-up, and data collection                                                                                                                                                                                        |
| Participants                 | 6       | (a) Give the eligibility criteria, and the sources and methods of selection of participants. Describe methods of follow-up<br>(b) For matched studies, give matching criteria and number of exposed and unexposed                                                                                                      |
| Variables                    | 7       | Clearly define all outcomes, exposures, predictors, potential confounders, and effect modifiers. Give diagnostic criteria, if applicable                                                                                                                                                                               |
| Data sources/<br>measurement | 8*      | For each variable of interest, give sources of data and details of methods of assessment (measurement). Describe comparability of assessment methods if there is more than one group                                                                                                                                   |
| Bias                         | 9       | Describe any efforts to address potential sources of bias                                                                                                                                                                                                                                                              |
| Study size                   | 10      | Explain how the study size was arrived at                                                                                                                                                                                                                                                                              |
| Quantitative variables       | 11      | Explain how quantitative variables were handled in the analyses. If applicable, describe which groupings were chosen and why                                                                                                                                                                                           |
| Statistical methods          | 12      | (a) Describe all statistical methods, including those used to control for confounding<br>(b) Describe any methods used to examine subgroups and interactions<br>(c) Explain how missing data were addressed<br>(d) If applicable, explain how loss to follow-up was addressed<br>(e) Describe any sensitivity analyses |
| <b>Results</b>               |         |                                                                                                                                                                                                                                                                                                                        |
| Participants                 | 13*     | (a) Report numbers of individuals at each stage of study—eg numbers potentially eligible, examined for eligibility, confirmed eligible, included in the study, completing follow-up, and analysed<br>(b) Give reasons for non-participation at each stage<br>(c) Consider use of a flow diagram                        |
| Descriptive data             | 14*     | (a) Give characteristics of study participants (eg demographic, clinical, social) and information on exposures and potential confounders<br>(b) Indicate number of participants with missing data for each variable of interest<br>(c) Summarise follow-up time (eg, average and total amount)                         |
| Outcome data                 | 15*     | Report numbers of outcome events or summary measures over time                                                                                                                                                                                                                                                         |
| Main results                 | 16      | (a) Give unadjusted estimates and, if applicable, confounder-adjusted estimates and their precision (eg, 95% confidence interval). Make clear which confounders were adjusted for and why they were included<br>(b) Report category boundaries when continuous variables were categorized                              |

|                          |    |                                                                                                                                                                            |
|--------------------------|----|----------------------------------------------------------------------------------------------------------------------------------------------------------------------------|
|                          |    | (c) If relevant, consider translating estimates of relative risk into absolute risk for a meaningful time period                                                           |
| Other analyses           | 17 | Report other analyses done—eg analyses of subgroups and interactions, and sensitivity analyses                                                                             |
| <b>Discussion</b>        |    |                                                                                                                                                                            |
| Key results              | 18 | Summarise key results with reference to study objectives                                                                                                                   |
| Limitations              | 19 | Discuss limitations of the study, taking into account sources of potential bias or imprecision. Discuss both direction and magnitude of any potential bias                 |
| Interpretation           | 20 | Give a cautious overall interpretation of results considering objectives, limitations, multiplicity of analyses, results from similar studies, and other relevant evidence |
| Generalisability         | 21 | Discuss the generalisability (external validity) of the study results                                                                                                      |
| <b>Other information</b> |    |                                                                                                                                                                            |
| Funding                  | 22 | Give the source of funding and the role of the funders for the present study and, if applicable, for the original study on which the present article is based              |

\*Give information separately for exposed and unexposed groups.

**Note:** An Explanation and Elaboration article discusses each checklist item and gives methodological background and published examples of transparent reporting. The STROBE checklist is best used in conjunction with this article (freely available on the Web sites of PLoS Medicine at <http://www.plosmedicine.org/>, Annals of Internal Medicine at <http://www.annals.org/>, and Epidemiology at <http://www.epidem.com/>). Information on the STROBE Initiative is available at <http://www.strobe-statement.org>.



**Self-rated health and mortality in individuals with diabetes mellitus: prospective cohort study**

|                                 |                                                                                                                                                                                                                                                                                                                                                                                                                                                                                                                                                                                                                                                                                                                                                                                                                                                                                                                                                                                                                                                                                                                                                                            |
|---------------------------------|----------------------------------------------------------------------------------------------------------------------------------------------------------------------------------------------------------------------------------------------------------------------------------------------------------------------------------------------------------------------------------------------------------------------------------------------------------------------------------------------------------------------------------------------------------------------------------------------------------------------------------------------------------------------------------------------------------------------------------------------------------------------------------------------------------------------------------------------------------------------------------------------------------------------------------------------------------------------------------------------------------------------------------------------------------------------------------------------------------------------------------------------------------------------------|
| Journal:                        | <i>BMJ Open</i>                                                                                                                                                                                                                                                                                                                                                                                                                                                                                                                                                                                                                                                                                                                                                                                                                                                                                                                                                                                                                                                                                                                                                            |
| Manuscript ID:                  | bmjopen-2011-000760.R1                                                                                                                                                                                                                                                                                                                                                                                                                                                                                                                                                                                                                                                                                                                                                                                                                                                                                                                                                                                                                                                                                                                                                     |
| Article Type:                   | Research                                                                                                                                                                                                                                                                                                                                                                                                                                                                                                                                                                                                                                                                                                                                                                                                                                                                                                                                                                                                                                                                                                                                                                   |
| Date Submitted by the Author:   | 11-Jan-2012                                                                                                                                                                                                                                                                                                                                                                                                                                                                                                                                                                                                                                                                                                                                                                                                                                                                                                                                                                                                                                                                                                                                                                |
| Complete List of Authors:       | Wennberg, Patrik; University of Umeå, Department of Public Health and Clinical Medicine<br>Rolandsson, Olov; Umeå University, Department of Public Health and Clinical Medicine, Family Medicine<br>Jerdén, Lars; Centre for Clinical Research Dalarna,<br>Boeing, Heiner; German Institute of Human Nutrition Potsdam-Rehbrücke, Department of Epidemiology<br>Sluik, Diewertje; German Institute of Human Nutrition Potsdam-Rehbrücke, Department of Epidemiology<br>Kaaks, Rudolf; German Cancer Research Centre, Division of Cancer Epidemiology<br>Teucher, Birgit; German Cancer Research Centre, Division of Cancer Epidemiology<br>Spijkerman, Annemieke; National Institute for Public Health and the Environment Centre for Prevention and Health Services Research,<br>de Mesquita, Bas; National Institute for Public Health and the Environment Centre for Prevention and Health Services Research,<br>Dethlefsen, Claus; Aalborg Sygehus, Kardiovaskulært Forskningscenter<br>Nilsson, Peter; University of Lund, Clinical Sciences<br>Nöthlings, Ute; Christian-Albrechts-University of Kiel, Institute for Experimental Medicine, Section for Epidemiology |
| <b>Primary Subject Heading</b>: | Diabetes and endocrinology                                                                                                                                                                                                                                                                                                                                                                                                                                                                                                                                                                                                                                                                                                                                                                                                                                                                                                                                                                                                                                                                                                                                                 |
| Secondary Subject Heading:      | General practice / Family practice, Patient-centred medicine                                                                                                                                                                                                                                                                                                                                                                                                                                                                                                                                                                                                                                                                                                                                                                                                                                                                                                                                                                                                                                                                                                               |
| Keywords:                       | General diabetes < DIABETES & ENDOCRINOLOGY, Diabetes & endocrinology < INTERNAL MEDICINE, PREVENTIVE MEDICINE, PRIMARY CARE                                                                                                                                                                                                                                                                                                                                                                                                                                                                                                                                                                                                                                                                                                                                                                                                                                                                                                                                                                                                                                               |
|                                 |                                                                                                                                                                                                                                                                                                                                                                                                                                                                                                                                                                                                                                                                                                                                                                                                                                                                                                                                                                                                                                                                                                                                                                            |

SCHOLARONE™  
Manuscripts

1  
2  
3 **Self-rated health and mortality in individuals with diabetes mellitus: prospective**  
4 **cohort study**  
5  
6

7  
8 Correspondence: Patrik Wennberg  
9

10 Fax: +46 90 776883, Telephone: +46 90 7851423  
11

12  
13 E-mail: patrik.wennberg@fammed.umu.se  
14

15  
16 Patrik Wennberg, *researcher*<sup>1</sup>, Olov Rolandsson, *associate professor*<sup>1</sup>, Lars Jerdén,  
17 *researcher*<sup>2</sup>, Heiner Boeing, *professor*<sup>3</sup>, Diewertje Sluik, *PhD student*<sup>3</sup>, Rudolf Kaaks,  
18 *professor*<sup>4</sup>, Birgit Teucher, *researcher*<sup>4</sup>, Annemieke Spijkerman, *researcher*<sup>5</sup>, Bas Bueno  
19 de Mesquita, *researcher*<sup>5</sup>, Claus Dethlefsen, *researcher*<sup>6</sup>, Peter M Nilsson, *professor*<sup>7</sup>, Ute  
20 Nöthlings, *professor*<sup>8</sup>  
21  
22  
23  
24  
25

26  
27 <sup>1</sup>Department of Public Health and Clinical Medicine, Family Medicine, Umeå University, SE-901 85  
28 Umeå, Sweden.

29 <sup>2</sup>Centre for Clinical Research Dalarna, Falun, Sweden  
30

31 <sup>3</sup>Department of Epidemiology, German Institute of Human Nutrition Potsdam-Rehbrücke, Nuthetal,  
32 Germany

33 <sup>4</sup>Division of Cancer Epidemiology, German Cancer Research Centre, Heidelberg, Germany  
34

35 <sup>5</sup>National Institute for Public Health and the Environment Centre for Prevention and Health Services  
36 Research, Bilthoven, The Netherlands  
37

38 <sup>6</sup>Kardiovaskulært Forskningscenter, Aalborg Sygehus, Aalborg, Denmark  
39

40 <sup>7</sup>Department of Clinical Sciences, Lund University, University Hospital, Malmö, Sweden  
41

42 <sup>8</sup>Institute for Experimental Medicine, Section for Epidemiology, Christian-Albrechts-University of  
43 Kiel, Kiel, Germany  
44  
45

46 Running title: Diabetes, self-rated health and mortality  
47

48  
49 *Key words:* Diabetes, self-rated health, mortality, prevention, cohort  
50

51  
52 Word count: 2915  
53  
54  
55  
56  
57  
58  
59  
60

1  
2  
3 "The Corresponding Author has the right to grant on behalf of all authors and  
4 does grant on behalf of all authors, an exclusive licence (or non-exclusive for  
5 government employees) on a worldwide basis to the BMJ Group and co-owners  
6 or contracting owning societies (where published by the BMJ Group on their  
7 behalf), and its Licensees to permit this article (if accepted) to be published in  
8 *BMJ Open* and any other BMJ Group products and to exploit all subsidiary rights,  
9 as set out in our licence."  
10  
11  
12  
13  
14  
15  
16  
17  
18  
19  
20  
21  
22  
23  
24  
25  
26  
27  
28  
29  
30  
31  
32  
33  
34  
35  
36  
37  
38  
39  
40  
41  
42  
43  
44  
45  
46  
47  
48  
49  
50  
51  
52  
53  
54  
55  
56  
57  
58  
59  
60

**Abstract**

**Objectives** To investigate whether low self-rated health is associated with increased mortality **in individuals with diabetes**.

**Design** Population-based prospective cohort study

**Setting** Enrolment took place between 1992 and 2000 in four centers (Bilthoven, Heidelberg, Potsdam, Umeå) in a sub-cohort nested in the European Prospective Investigation into Cancer and Nutrition.

**Participants** 3,257 individuals (mean  $\pm$  SD age was  $55.8 \pm 7.6$  years and 42% women) with confirmed diagnosis of diabetes mellitus.

**Primary outcome measure** We used Cox proportional hazards modeling to estimate hazard ratios (HRs) for total mortality controlling for age, center, sex, educational level, BMI, physical inactivity, smoking, insulin treatment, hypertension, hyperlipidaemia, history of myocardial infarction, stroke or cancer.

**Results** During follow-up (mean follow-up  $\pm$  SD was  $8.6 \pm 2.3$  years) 344 deaths (241 men/103 women) occurred. In a multivariate model, individuals with low self-rated health were at higher risk of mortality (hazard ratio 1.38, 95% confidence interval 1.10 to 1.73) than individuals with high self-rated health. The association was mainly driven by increased five-year mortality **and was stronger among individuals with BMI <25 than in obese individuals. In sex-specific analyses the association was statistically significant in men only.** There was no indication of heterogeneity across centres.

**Conclusions** Low self-rated health was associated with increased mortality in **individuals with diabetes** after controlling for established risk factors. In diabetes patients with low self-rated health, the physician should consider a more detailed consultation and intensified support.



## Article summary

### Article focus

- Is low self-rated health associated with increased mortality in individuals with diabetes?
- If so, is the association between self-rated health and mortality in individuals with diabetes moderated by socio-demographic and health-related variables?

### Key messages

- Low self-rated health was associated with increased mortality in individuals with diabetes after controlling for established risk factors. The association was homogeneous across the four EPIC centres situated in three different European countries.
- The association between low self-rated health and mortality was mainly driven by increased five-year mortality in men and was stronger among individuals with BMI <25 than in obese individuals.

### Strength and limitations of this study

- To our knowledge, this is the first study that evaluates this research question in a population-based cohort of individuals with diabetes with long-term follow-up (up to a maximum of 14 years) in different European countries.
- The association between self-rated health and mortality remained robust after controlling for potential confounders including previous myocardial infarction, stroke or cancer, but we cannot rule out residual confounding from other comorbidity that was not assessed at baseline.

## Introduction

Patients with diabetes have a 1.5–2.5-fold higher risk of death compared to a non-diabetic population.[1-4] The excess mortality in diabetes patients is mainly caused by a higher risk of cardiovascular (CVD) mortality,[3-4] but mortality due to cancer is also increased.[5] It is of great importance to identify diabetes patients with high risk of CVD morbidity and mortality early on in the disease process in order to intervene with medication and lifestyle changes.[6] Hence, risk engines[7] or risk scores[8] have been developed to identify the subjects at highest risk of developing CVD. None of these tools have utilized subjective measures of health.

Self-rated health (SRH) is a subjective measure of health usually defined by responses to a single question such as “How do you rate your health?” SRH has been associated with future health outcomes such as cardiovascular events[9] and mortality both in representative community samples[10] and in defined patient cohorts.[11-13] Although there is no consensus on what SRH really represents, SRH is drawing increasingly attention as a key parameter in health care, including health policy evaluation, population surveys and research.[14] Previous research in different populations has suggested that the predictive strength of SRH for subsequent mortality may differ by sex,[15] age,[16] race,[17] education level,[18] and experience of chronic disease.[19] Studies evaluating SRH among **individuals with diabetes** are scarce. One previous study showed that SRH predicted vascular events and major complications in diabetes patients.[20]

The primary aim of this study was to investigate whether low self-rated health is associated with increased mortality in individuals with diabetes. Prospective studies investigating this research question have been restricted to short-term mortality (up to four years),[21-22] whereas we can present data from a study with a mean follow-up of 8.6 years. As a secondary aim we investigated whether socio-demographic and health-

1  
2  
3 related variables moderate the association between SRH and mortality in this cohort of  
4  
5 individuals with diabetes.  
6  
7

## 8 **Methods**

### 9 *Study population*

10  
11  
12  
13  
14 The study was nested in the European Prospective Investigation into Cancer and Nutrition  
15 (EPIC). EPIC is an ongoing cohort study, which consists of 519,978 men and women from  
16 ten European countries. A detailed description of the study design and methods can be  
17 found elsewhere.[23-24] Participants were 35 to 70 years at enrolment between 1992  
18 and 2000 and were recruited predominantly from the general population residing in a  
19 given geographic area. Participants gave their written consent and the study was  
20 approved by the ethical review boards of the International Agency for Research on  
21 Cancer and by the review boards at the local centres where participants had been  
22 recruited for the EPIC study. Originally, the EPIC centres in Denmark, Germany, Italy,  
23 Spain, Sweden and the Netherlands contributed 7,048 cases of self-reported diabetes at  
24 baseline. Self-reports of diabetes obtained at baseline were confirmed by additional  
25 information sources, which include the following depending on the available options in  
26 the different countries: contact with a medical practitioner, use of diabetes-related  
27 medication (e.g. insulin and blood glucose lowering drugs), repeated self-report during  
28 follow-up, linkage to diabetes registries, or a measure of glycated haemoglobin (HbA1c)  
29 above 6%.[25] A total of 5,542 cases of diabetes mellitus could be confirmed. We also  
30 included 870 participants whose diabetes diagnosis was confirmed within another project  
31 in EPIC, leading to a sub-cohort of 6,412 individuals with confirmed diabetes at  
32 baseline.[26] For the current study, only EPIC study centres which could provide data on  
33 SRH were included (Germany: Heidelberg and Potsdam; the Netherlands: Bilthoven;  
34 Sweden: Umeå). For this reason, 3,155 participants (from the centres in Denmark, Italy  
35 and Spain) were excluded. The final dataset therefore comprised 3,257 participants from  
36  
37  
38  
39  
40  
41  
42  
43  
44  
45  
46  
47  
48  
49  
50  
51  
52  
53  
54  
55  
56  
57  
58  
59  
60

1  
2  
3 four EPIC study centres with a confirmed diagnosis of diabetes mellitus at baseline. No  
4 clear separation between type 1 and type 2 diabetes could be made.  
5

#### 6 7 *Assessment of self-rated health*

8  
9  
10 SRH was assessed at baseline using self-administered questionnaires in the native  
11 language. The questionnaires were somewhat differently formulated at each centre and  
12 were therefore standardized (described in **Appendix**). Given the low frequency of  
13 responses in the extreme categories (n=316 in the highest and n=241 in the lowest), we  
14 dichotomized the SRH variable by combining the two highest categories (high SRH) and  
15 the two lowest categories (low SRH) **in conformity with previous studies.[12 17 21]**  
16  
17  
18  
19  
20  
21

#### 22 23 *Covariates and outcome*

24  
25 Weight and height were measured with participants not wearing shoes. Each participant's  
26 body weight was corrected for clothing worn during measurement in order to reduce  
27 heterogeneity due to protocol differences among centres.[27] Body mass index (BMI)  
28 was calculated after measurement of body weight and height, as weight (kilograms)  
29 divided by height (metres squared). **Overweight was defined as a BMI of 25-29.9 and**  
30 **obesity as greater than or equal to 30 according to WHO guidelines. Underweight was**  
31 **defined as a BMI value <20. Since there were only 43 persons with underweight, we**  
32 **merged underweight with the normal BMI category.** For the blood pressure  
33 measurements, uniform procedures were recommended. Hypertension was defined by a  
34 hypertension diagnosis or use of hypertensive medication or blood pressure  $\geq 140/90$   
35 mmHg. Further health-related variables were collected using questionnaires including  
36 questions on educational level, smoking status (current smoker versus non-smoker or  
37 ex-smoker), physical activity level, and medical history including history of myocardial  
38 infarction, stroke and cancer. Physical inactivity was defined using the Cambridge Index.  
39 [28] Hyperlipidaemia was defined by use of medication for hyperlipidaemia.  
40  
41  
42  
43  
44  
45  
46  
47  
48  
49  
50  
51  
52  
53  
54

55  
56 Participants were followed from study entry until death, emigration, withdrawal, or end of  
57 follow-up period. Causes and dates of deaths were ascertained using record linkages with  
58  
59  
60

1  
2  
3 central cancer registries, death indexes or by follow-up mailings and subsequent inquiries  
4 to municipality registries, regional health departments, physicians or hospitals. Mortality  
5 data were coded following the 10th revision of the International Classification of  
6 Diseases, Injuries and Causes of Death (ICD-10). ICD-10 codes I00–I99 were used to  
7 calculate proportions of cardiovascular mortality. Hazard ratios were calculated for all-  
8 cause mortality only, since we did not have statistical power for analyses of specified  
9 mortality.

### 10 11 12 13 14 15 16 17 *Statistical analyses*

18  
19  
20 Chi-square test was used for testing proportions in categorical variables. Kruskal-Wallis  
21 test was used for significance testing in continuous variables. Hazard ratios (HRs) and  
22 95% confidence intervals (CI) were estimated using Cox proportional hazards models.  
23 Age was used as the primary time variable, with entry time defined as the subject's age  
24 in years at recruitment and exit time defined as the subject's age in years at death or  
25 censoring. Multivariate models were constructed to determine HRs adjusted for  
26 covariates. Age, centre, sex, BMI, physical inactivity, insulin treatment, hypertension and  
27 history of myocardial infarction, stroke or cancer were tested as covariates and included  
28 in the multivariate model since they met the criteria of being significantly associated with  
29 both SRH and mortality during follow-up in men or in women. Given the low frequencies  
30 of previous myocardial infarction, stroke and cancer, these covariates were combined in  
31 one variable in the multivariate analysis to ensure a good model fit. Interaction was  
32 tested by including interaction terms in the Cox proportional hazards analysis. The  
33 hazard ratios were combined across centres using random effects meta-analysis, and  $I^2$  –  
34 the percentage of variation between centres due to real heterogeneity – was calculated.  
35 The first sensitivity analysis was performed to see if the strength of the association  
36 between SRH and mortality differed for short-term mortality and long-term mortality.  
37 Short-term mortality was defined as death within 5 years and long-term mortality as  
38 death after 5 years or more. This cut-off point was close to the median follow-up time of  
39 the decedents (5.4 years). The second sensitivity analysis was performed by excluding  
40  
41  
42  
43  
44  
45  
46  
47  
48  
49  
50  
51  
52  
53  
54  
55  
56  
57  
58  
59  
60

1  
2  
3 participants with **underweight** (BMI<20). A *P*-value under 0.05 was considered  
4 significant. All analyses were performed using SPSS Statistics 19.0 except for the *I*<sup>2</sup> index  
5 test which was performed using Comprehensive Meta-Analysis version 2.  
6  
7

### 8 9 *Missing values*

10  
11  
12 There was no information on history of stroke and cancer from the centre in Umeå  
13 (n=427) and these missing values were assigned to a separate category in multivariate  
14 analysis. The proportions of missing values for other variables were all less than 2.5%  
15 and coded as missing in multivariate analysis. Consequently, 85 persons including eight  
16 decedents were lost in the multivariate analysis.  
17  
18  
19  
20  
21

### 22 23 24 25 **Results**

26  
27 The mean follow-up time was 8.6 years ( $\pm$  2.3). Baseline characteristics for the 1,903  
28 men and 1,354 women are presented in **Table 1**. Mean age at baseline was 56.2 years  
29 ( $\pm$  7.1) for men and 55.4 years ( $\pm$  8.2) for women. Among the 3,257 persons included  
30 in the study there were 241 deaths (13%) in men and 103 deaths (8%) in women. Of  
31 the 344 persons who died, 40% were cardiovascular deaths, 52% were non-  
32 cardiovascular deaths and in 8% the cause of death was unknown.  
33  
34  
35  
36  
37  
38  
39

40  
41 **Table 2** shows the baseline characteristics in relation to categories of SRH. Persons with  
42 low SRH were younger, more frequently women, had higher BMI and had more  
43 frequently a history of myocardial infarction or stroke compared to persons with high  
44 SRH. Moreover, in men with low SRH, insulin treatment was more common and in  
45 women with low SRH, hypertension and a history of cancer were more common.  
46  
47  
48  
49

50  
51  
52 In a model adjusted for age and centre, low SRH was associated with increased  
53 mortality (**Table 3**). In sex-specific analyses, this association was significant in men but  
54 not in women. After further adjustments for potential confounders, the association  
55 between low SRH and mortality was attenuated but remained significant in men and in  
56  
57  
58  
59  
60

1  
2  
3 both sexes combined. The fully adjusted HR for both sexes was 1.38 (95% confidence  
4 interval 1.10 to 1.73). In a sensitivity analyses we calculated HRs for low SRH for short-  
5 term mortality (participants who died within 5 years of follow-up, n=158) and long-term  
6 mortality (participants who died after 5 years or more, n=186). HR of low SRH for short-  
7 term mortality was 1.91 (1.30 to 2.80) for men and 1.38 (0.75 to 2.55) for women in  
8 the fully adjusted model. HR of low SRH for long-term mortality was 1.24 (0.85 to 1.79)  
9 for men and 0.94 (0.53 to 1.67) for women in the same multivariate model.  
10  
11  
12  
13  
14  
15  
16  
17

18 Interaction analyses were performed between SRH and covariates in relation to  
19 mortality. We found a significant interaction between SRH and BMI with  $P_{\text{interaction}}$  value  
20 0.03. When analysing HRs for SRH in different categories of BMI we found stronger  
21 associations between SRH and mortality at lower levels of BMI, indicating an  
22 antagonistic interaction (**Table 4**). For example, in the category normal or underweight  
23 the fully adjusted HR for both sexes combined was 2.95 (1.71 to 5.10), compared to  
24 1.14 (0.79 to 1.65) in obese individuals. Consequently, we performed a second  
25 sensitivity analysis by excluding persons with underweight (BMI <20, 43 persons) from  
26 the main analysis of SRH and mortality, which attenuated the fully adjusted HR from  
27 1.38 to 1.36 (1.08 to 1.70) in both sexes combined. We found no statistical interaction  
28 between SRH and sex ( $P_{\text{interaction}}$  value 0.30), age ( $P_{\text{interaction}}$  value 0.22), education level  
29 ( $P_{\text{interaction}}$  value 0.14), smoking ( $P_{\text{interaction}}$  value 0.13), physical inactivity ( $P_{\text{interaction}}$  value  
30 0.24), insulin treatment ( $P_{\text{interaction}}$  value 0.18), hypertension ( $P_{\text{interaction}}$  value 0.23),  
31 hyperlipidaemia ( $P_{\text{interaction}}$  value 0.16) and history of myocardial infarction, stroke or  
32 cancer ( $P_{\text{interaction}}$  value 0.29).  
33  
34  
35  
36  
37  
38  
39  
40  
41  
42  
43  
44  
45  
46  
47  
48  
49

50 **Figure 1** shows a forest plot with adjusted HRs for low SRH by sex and in both sexes  
51 combined for each centre. We found no clear indication of heterogeneity in the  
52 association between SRH and mortality across centres ( $I^2$  index=0).  
53  
54  
55  
56  
57

## 58 Discussion

1  
2  
3 We found that low SRH was associated with an increased risk of mortality in **individuals**  
4 **with diabetes** after adjusting for major established risk factors. This association was  
5  
6 homogeneous across the four EPIC centres situated in three different European countries.  
7  
8 The strength of the association between SRH and mortality in this study was similar to  
9  
10 results in general populations.[29] In sex-specific analyses we found that the association  
11  
12 between SRH and mortality was significant in men but not in women. However, the HR in  
13  
14 women pointed in the same direction as in men, and we cannot rule out that the lack of  
15  
16 significance was due to the lower statistical power to detect an association in women.  
17  
18 Interestingly, the association between SRH and mortality was stronger among **individuals**  
19  
20 **with BMI <25** than among obese individuals in both men and women. This finding could  
21  
22 possibly be explained by the presence of other chronic diseases leading to low body  
23  
24 weight, low SRH and higher risk of premature death. However, the association between  
25  
26 low SRH and mortality remained significant even after the exclusion of persons with BMI  
27  
28 <20. Therefore, there are likely other factors contributing to the weaker association  
29  
30 between SRH and overall mortality in obese **individuals with diabetes**. First, we found  
31  
32 that the proportion of cardiovascular mortality was highest **among obese individuals** in  
33  
34 both men and women, suggesting that the mortality pattern may be different at  
35  
36 different levels of BMI. Previous research has shown that the link between SRH and  
37  
38 mortality may be weaker for cardiovascular mortality than for cancer mortality or  
39  
40 mortality from other causes.[30] Second, we found that the obese individuals rated their  
41  
42 health lower than **individuals** with normal weight, which is in line with studies on general  
43  
44 populations.[31] Previous studies have shown that obese **persons** may experience  
45  
46 discrimination, stigmatization and major limitations in daily life linked to their  
47  
48 obesity.[32-33] These factors will likely have a considerable impact on their health  
49  
50 perception. We hypothesize that these factors related to obesity may overshadow other  
51  
52 important health problems or health behaviours in the perception of health and possibly  
53  
54 weaken the association between SRH and mortality in obese **individuals**.  
55  
56  
57  
58  
59  
60



1  
2  
3 The association between SRH and mortality has been of interest in medical research for  
4 several decades. Already in 1973, Maddox, one of the pioneers in this research field  
5 stated that SRH “clearly measure something more—and something less—than objective  
6 medical ratings”.<sup>[34]</sup> It is still debated what information individuals rely on when rating  
7 their health. Qualitative research has suggested that SRH reflects a combination of  
8 specific health problems, general physical functioning and health behaviours.<sup>[35]</sup> Cultural  
9 differences may also have an impact on SRH, even within Europe.<sup>[36]</sup> A previous  
10 quantitative study from NHANES found that low SRH is particularly predictive for  
11 respondents with self-reported history of circulatory system diagnoses and perception of  
12 symptoms, but not for respondents without symptoms or diagnoses.<sup>[19]</sup>  
13  
14  
15  
16  
17  
18  
19  
20  
21  
22  
23

24 Only a few studies have evaluated the association between SRH and mortality in well-  
25 defined cohorts of diabetes patients.<sup>[21-22 37]</sup> In 1994, Dasbach and colleagues found  
26 increased mortality in 987 patients with older onset of diabetes who rated their health  
27 as worse than other people of similar age. The average age in their study was 64.7  
28 years ( $\pm 11.0$ ) compared to 55.8 years ( $\pm 7.6$ ) in our study. More recently, McEwen and  
29 co-workers found that SRH predicted mortality in an American multi-ethnic cohort of  
30 over 7,000 diabetes patients.<sup>[21]</sup> However, their study was restricted to patients with  
31 longer duration of diabetes (diagnosed at least 18 months before survey) in managed  
32 care and a relatively short follow-up (the average length was 3.7 years). In the FIELD  
33 study, a controlled trial of fenofibrate performed in Australia, New Zealand and Finland,  
34 the mean duration of follow-up was even shorter, only 2.4 years. In this study involving  
35 7348 diabetes patients, Clarke and colleagues found that low SRH was associated with  
36 vascular events, diabetes complications and all-cause mortality.<sup>[22]</sup> In our study, which  
37 was population-based, the participants were younger and followed for an average of 8.6  
38 years. We found that the association between SRH and mortality was weaker and no  
39 longer statistically significant when we restricted the analysis to long-term mortality.  
40  
41  
42  
43  
44  
45  
46  
47  
48  
49  
50  
51  
52  
53  
54  
55  
56  
57  
58  
59  
60  
61  
62  
63  
64  
65  
66  
67  
68  
69  
70  
71  
72  
73  
74  
75  
76  
77  
78  
79  
80  
81  
82  
83  
84  
85  
86  
87  
88  
89  
90  
91  
92  
93  
94  
95  
96  
97  
98  
99  
100  
101  
102  
103  
104  
105  
106  
107  
108  
109  
110  
111  
112  
113  
114  
115  
116  
117  
118  
119  
120  
121  
122  
123  
124  
125  
126  
127  
128  
129  
130  
131  
132  
133  
134  
135  
136  
137  
138  
139  
140  
141  
142  
143  
144  
145  
146  
147  
148  
149  
150  
151  
152  
153  
154  
155  
156  
157  
158  
159  
160  
161  
162  
163  
164  
165  
166  
167  
168  
169  
170  
171  
172  
173  
174  
175  
176  
177  
178  
179  
180  
181  
182  
183  
184  
185  
186  
187  
188  
189  
190  
191  
192  
193  
194  
195  
196  
197  
198  
199  
200  
201  
202  
203  
204  
205  
206  
207  
208  
209  
210  
211  
212  
213  
214  
215  
216  
217  
218  
219  
220  
221  
222  
223  
224  
225  
226  
227  
228  
229  
230  
231  
232  
233  
234  
235  
236  
237  
238  
239  
240  
241  
242  
243  
244  
245  
246  
247  
248  
249  
250  
251  
252  
253  
254  
255  
256  
257  
258  
259  
260  
261  
262  
263  
264  
265  
266  
267  
268  
269  
270  
271  
272  
273  
274  
275  
276  
277  
278  
279  
280  
281  
282  
283  
284  
285  
286  
287  
288  
289  
290  
291  
292  
293  
294  
295  
296  
297  
298  
299  
300  
301  
302  
303  
304  
305  
306  
307  
308  
309  
310  
311  
312  
313  
314  
315  
316  
317  
318  
319  
320  
321  
322  
323  
324  
325  
326  
327  
328  
329  
330  
331  
332  
333  
334  
335  
336  
337  
338  
339  
340  
341  
342  
343  
344  
345  
346  
347  
348  
349  
350  
351  
352  
353  
354  
355  
356  
357  
358  
359  
360  
361  
362  
363  
364  
365  
366  
367  
368  
369  
370  
371  
372  
373  
374  
375  
376  
377  
378  
379  
380  
381  
382  
383  
384  
385  
386  
387  
388  
389  
390  
391  
392  
393  
394  
395  
396  
397  
398  
399  
400  
401  
402  
403  
404  
405  
406  
407  
408  
409  
410  
411  
412  
413  
414  
415  
416  
417  
418  
419  
420  
421  
422  
423  
424  
425  
426  
427  
428  
429  
430  
431  
432  
433  
434  
435  
436  
437  
438  
439  
440  
441  
442  
443  
444  
445  
446  
447  
448  
449  
450  
451  
452  
453  
454  
455  
456  
457  
458  
459  
460  
461  
462  
463  
464  
465  
466  
467  
468  
469  
470  
471  
472  
473  
474  
475  
476  
477  
478  
479  
480  
481  
482  
483  
484  
485  
486  
487  
488  
489  
490  
491  
492  
493  
494  
495  
496  
497  
498  
499  
500  
501  
502  
503  
504  
505  
506  
507  
508  
509  
510  
511  
512  
513  
514  
515  
516  
517  
518  
519  
520  
521  
522  
523  
524  
525  
526  
527  
528  
529  
530  
531  
532  
533  
534  
535  
536  
537  
538  
539  
540  
541  
542  
543  
544  
545  
546  
547  
548  
549  
550  
551  
552  
553  
554  
555  
556  
557  
558  
559  
560  
561  
562  
563  
564  
565  
566  
567  
568  
569  
570  
571  
572  
573  
574  
575  
576  
577  
578  
579  
580  
581  
582  
583  
584  
585  
586  
587  
588  
589  
590  
591  
592  
593  
594  
595  
596  
597  
598  
599  
600  
601  
602  
603  
604  
605  
606  
607  
608  
609  
610  
611  
612  
613  
614  
615  
616  
617  
618  
619  
620  
621  
622  
623  
624  
625  
626  
627  
628  
629  
630  
631  
632  
633  
634  
635  
636  
637  
638  
639  
640  
641  
642  
643  
644  
645  
646  
647  
648  
649  
650  
651  
652  
653  
654  
655  
656  
657  
658  
659  
660  
661  
662  
663  
664  
665  
666  
667  
668  
669  
670  
671  
672  
673  
674  
675  
676  
677  
678  
679  
680  
681  
682  
683  
684  
685  
686  
687  
688  
689  
690  
691  
692  
693  
694  
695  
696  
697  
698  
699  
700  
701  
702  
703  
704  
705  
706  
707  
708  
709  
710  
711  
712  
713  
714  
715  
716  
717  
718  
719  
720  
721  
722  
723  
724  
725  
726  
727  
728  
729  
730  
731  
732  
733  
734  
735  
736  
737  
738  
739  
740  
741  
742  
743  
744  
745  
746  
747  
748  
749  
750  
751  
752  
753  
754  
755  
756  
757  
758  
759  
760  
761  
762  
763  
764  
765  
766  
767  
768  
769  
770  
771  
772  
773  
774  
775  
776  
777  
778  
779  
780  
781  
782  
783  
784  
785  
786  
787  
788  
789  
790  
791  
792  
793  
794  
795  
796  
797  
798  
799  
800  
801  
802  
803  
804  
805  
806  
807  
808  
809  
810  
811  
812  
813  
814  
815  
816  
817  
818  
819  
820  
821  
822  
823  
824  
825  
826  
827  
828  
829  
830  
831  
832  
833  
834  
835  
836  
837  
838  
839  
840  
841  
842  
843  
844  
845  
846  
847  
848  
849  
850  
851  
852  
853  
854  
855  
856  
857  
858  
859  
860  
861  
862  
863  
864  
865  
866  
867  
868  
869  
870  
871  
872  
873  
874  
875  
876  
877  
878  
879  
880  
881  
882  
883  
884  
885  
886  
887  
888  
889  
890  
891  
892  
893  
894  
895  
896  
897  
898  
899  
900  
901  
902  
903  
904  
905  
906  
907  
908  
909  
910  
911  
912  
913  
914  
915  
916  
917  
918  
919  
920  
921  
922  
923  
924  
925  
926  
927  
928  
929  
930  
931  
932  
933  
934  
935  
936  
937  
938  
939  
940  
941  
942  
943  
944  
945  
946  
947  
948  
949  
950  
951  
952  
953  
954  
955  
956  
957  
958  
959  
960  
961  
962  
963  
964  
965  
966  
967  
968  
969  
970  
971  
972  
973  
974  
975  
976  
977  
978  
979  
980  
981  
982  
983  
984  
985  
986  
987  
988  
989  
990  
991  
992  
993  
994  
995  
996  
997  
998  
999  
1000

1  
2  
3 of health and we therefore suggest that future research in **individuals with diabetes**  
4  
5 should include repeated self-ratings and follow-up for long-term mortality.  
6  
7

8  
9 There are some limitations to our study. Even if the association between SRH and  
10 mortality was robust when individuals with **underweight** were excluded, we cannot rule  
11 out other potential residual confounding from co-morbidity other than MI, stroke or  
12 cancer that was not assessed at baseline health examinations. Moreover, the sample size  
13 in the present study did not allow any clear conclusions in relation to sex-specific  
14 analyses and **we could not make a separation between type 1 and type 2 diabetes**. The  
15 questions and the response alternatives on SRH were formulated somewhat differently  
16 and in the native language at each centre. The questions and answers were translated  
17 and standardized in four response alternatives, which may have led to some degree of  
18 misclassification, particularly for the centres in Bilthoven and Umeå (which had five  
19 response alternatives). However, the forest plot gave no indication that the  
20 standardization in four response alternatives had a major impact on the risk estimates.  
21 The multivariate models used in this study were similar but not identical with equations  
22 used in risk engines[7] and risk scores.[8] Whether SRH adds predictive value over and  
23 above these models needs to be further analysed in future studies using adequate  
24 methods.[38]  
25  
26  
27  
28  
29  
30  
31  
32  
33  
34  
35  
36  
37  
38  
39  
40

41 Although more research is needed to gain a more complete understanding of the  
42 relationship between SRH and mortality in **individuals with diabetes**, we find that self-  
43 ratings of health are an inexpensive and time-efficient way to obtain subjective  
44 prognostic information that may be difficult to assess by objective health measurements.  
45 In diabetes patients with low SRH the physician should consider a more detailed  
46 consultation and intensified support.  
47  
48  
49  
50  
51  
52

53  
54  
55  
56 *Conclusions*  
57  
58  
59  
60

1  
2  
3 This is the first study investigating the association between self-rated health and  
4 mortality in individuals with diabetes with a long-term follow-up in different European  
5 countries. We found that low self-rated health was associated with increased mortality in  
6  
7 individuals with diabetes after controlling for established risk factors. The association  
8  
9 was mainly driven by increased five-year mortality in men and was stronger among  
10  
11 individuals with BMI <25 than in obese individuals.  
12  
13  
14  
15  
16  
17  
18  
19  
20  
21  
22  
23  
24  
25  
26  
27  
28  
29  
30  
31  
32  
33  
34  
35  
36  
37  
38  
39  
40  
41  
42  
43  
44  
45  
46  
47  
48  
49  
50  
51  
52  
53  
54  
55  
56  
57  
58  
59  
60

**Table 1** Baseline characteristics of 3257 individuals with diabetes participating in the European Prospective Investigation into Cancer and Nutrition. Data are presented as percent or mean (standard deviation).

|                                         | Men<br>N=1903 | Women<br>N=1354 |
|-----------------------------------------|---------------|-----------------|
| Age (years)                             | 56.2 (7.1)    | 55.4 (8.2)      |
| Self-rated health (%)                   |               |                 |
| High                                    |               |                 |
| <i>Excellent</i>                        | 10.5          | 8.6             |
| <i>Good</i>                             | 54.1          | 49.9            |
| Low                                     |               |                 |
| <i>Moderate</i>                         | 28.4          | 33.5            |
| <i>Poor</i>                             | 7.0           | 8.0             |
| Education (%)                           |               |                 |
| <i>None</i>                             | 0.6           | 1.8             |
| <i>Primary school</i>                   | 35.0          | 43.9            |
| <i>Technical/professional school</i>    | 29.1          | 33.7            |
| <i>Secondary school</i>                 | 6.8           | 7.6             |
| <i>Longer (incl. university degree)</i> | 28.6          | 13.1            |
| BMI (kg/m <sup>2</sup> )                | 28.6 (4.3)    | 29.5 (5.6)      |
| Current smoking (%)                     | 24.0          | 16.2            |
| Physical inactivity (%)                 | 26.8          | 33.0            |
| Insulin treatment (%)                   | 22.8          | 24.3            |
| Hypertension (%)                        | 70.0          | 71.3            |
| Hyperlipidaemia (%)                     | 21.8          | 18.5            |
| History of myocardial infarction (%)    | 9.2           | 3.8             |
| History of stroke (%)                   | 3.5           | 3.0             |
| History of cancer (%)                   | 4.1           | 6.4             |

**Table 2** Baseline characteristics in relation to categories of self-rated health. Data are presented as percent or mean.

|                                      | Men               |                 |             |                  |             | Women             |             |      |      |        |
|--------------------------------------|-------------------|-----------------|-------------|------------------|-------------|-------------------|-------------|------|------|--------|
|                                      | Self-rated health |                 |             |                  | P           | Self-rated health |             |      |      | P      |
|                                      | High              |                 | Low         |                  |             | High              |             | Low  |      |        |
| <i>Excellent</i>                     | <i>Good</i>       | <i>Moderate</i> | <i>Poor</i> | <i>Excellent</i> | <i>Good</i> | <i>Moderate</i>   | <i>Poor</i> |      |      |        |
| Age (years)                          | 57.1              | 56.6            | 55.2        | 55.4             | <0.001      | 53.8              | 55.8        | 55.4 | 54.1 | 0.001  |
| Education (%)                        |                   |                 |             |                  |             |                   |             |      |      |        |
| None                                 | 0.5               | 0.5             | 0.7         | 0.8              | 0.42        | 1.7               | 1.5         | 2.0  | 2.9  | 0.40   |
| Primary school                       | 35.9              | 33.1            | 36.8        | 42.4             |             | 35.3              | 44.6        | 44.5 | 44.8 |        |
| Technical/<br>professional school    | 31.8              | 28.4            | 29.3        | 28.8             |             | 41.4              | 33.2        | 32.3 | 34.3 |        |
| Secondary school                     | 6.6               | 6.7             | 7.5         | 4.5              |             | 8.6               | 6.3         | 9.8  | 5.7  |        |
| Longer (incl.<br>university degree)  | 25.3              | 31.3            | 25.7        | 23.5             |             | 12.9              | 14.5        | 11.4 | 12.4 |        |
| BMI (kg/m <sup>2</sup> )             | 28.6              | 28.4            | 28.9        | 29.0             | 0.05        | 28.1              | 29.2        | 30.0 | 31.1 | <0.001 |
| Current smoking (%)                  | 25.5              | 23.4            | 24.8        | 23.7             | 0.89        | 16.4              | 15.6        | 15.4 | 21.3 | 0.49   |
| Physical inactivity (%)              | 20.6              | 26.3            | 26.6        | 41.1             | 0.001       | 18.3              | 32.8        | 35.8 | 39.8 | 0.002  |
| Insulin treatment (%)                | 15.2              | 20.8            | 27.4        | 29.2             | 0.002       | 18.1              | 23.0        | 28.0 | 24.1 | 0.15   |
| Hypertension (%)                     | 67.5              | 68.5            | 74.0        | 70.7             | 0.11        | 56.9              | 72.4        | 72.3 | 75.0 | 0.004  |
| Hyperlipidaemia (%)                  | 22.0              | 20.4            | 24.1        | 21.8             | 0.42        | 14.7              | 18.6        | 19.0 | 20.4 | 0.69   |
| History of myocardial infarction (%) | 9.0               | 6.9             | 11.5        | 17.3             | <0.001      | 1.7               | 2.4         | 6.0  | 4.6  | 0.009  |
| History of stroke (%)                | 2.8               | 2.4             | 4.5         | 9.5              | 0.001       | 1.0               | 2.1         | 4.7  | 3.3  | 0.07   |
| History of cancer (%)                | 5.1               | 5.1             | 3.6         | 5.7              | 0.61        | 4.9               | 5.8         | 6.1  | 14.3 | 0.02   |

**Table 3** Hazard ratios (HRs) of low (moderate or poor) versus high (excellent or good) self-rated health for all-cause mortality during follow-up.

|            | Model 1*            | Model 2†            | Model 3‡            |
|------------|---------------------|---------------------|---------------------|
|            | HR (95% CI)         | HR (95% CI)         | HR (95% CI)         |
| Both sexes | 1.56 (1.25 to 1.94) | 1.49 (1.19 to 1.86) | 1.38 (1.10 to 1.73) |
| Men        | 1.75 (1.35 to 2.27) | 1.63 (1.25 to 2.12) | 1.52 (1.16 to 1.98) |
| Women      | 1.35 (0.90 to 2.03) | 1.21 (0.80 to 1.83) | 1.11 (0.73 to 1.69) |

\*Adjusted for age and centre.

†Adjusted for age, centre, sex, BMI, physical inactivity, insulin treatment and hypertension.

‡Adjusted for age, centre, sex, BMI, physical inactivity, insulin treatment, hypertension and history of myocardial infarction, stroke or cancer.

**Table 4** Hazard ratios (HRs) of low versus high self-rated health for all-cause mortality by categories of body mass index.

|            | BMI classification            | BMI (kg/m <sup>2</sup> ) | CV mortality (%) | Model 1* HR (95% CI) | Model 2† HR (95% CI) | Model 3‡ HR (95% CI) |
|------------|-------------------------------|--------------------------|------------------|----------------------|----------------------|----------------------|
| Both sexes | Normal or underweight (n=646) | <25                      | 38.3             | 2.81 (1.65 to 4.79)  | 3.12 (1.81 to 5.37)  | 2.95 (1.71 to 5.10)  |
|            | Overweight (n=1408)           | 25-29.9                  | 37.3             | 1.46 (1.05 to 2.03)  | 1.34 (0.96 to 1.89)  | 1.22 (0.87 to 1.71)  |
|            | Obesity (n=1203)              | ≥30                      | 45.0             | 1.29 (0.90 to 1.85)  | 1.20 (0.83 to 1.72)  | 1.14 (0.79 to 1.65)  |
| Men        | Normal or underweight (n=359) | <25                      | 39.5             | 2.77 (1.49 to 5.15)  | 3.61 (1.90 to 6.85)  | 3.57 (1.88 to 6.78)  |
|            | Overweight (n=921)            | 25-29.9                  | 39.0             | 1.62 (1.12 to 2.36)  | 1.45 (0.99 to 2.14)  | 1.33 (0.90 to 1.95)  |
|            | Obesity (n=623)               | ≥30                      | 47.5             | 1.57 (1.00 to 2.47)  | 1.38 (0.87 to 2.18)  | 1.31 (0.83 to 2.08)  |
| Women      | Normal or underweight (n=287) | <25                      | 35.3             | 3.14 (1.10 to 8.94)  | 2.47 (0.79 to 7.66)  | 1.87 (0.59 to 6.00)  |
|            | Overweight (n=487)            | 25-29.9                  | 31.4             | 1.20 (0.61 to 2.38)  | 1.04 (0.51 to 2.11)  | 0.93 (0.45 to 1.91)  |
|            | Obesity (n=580)               | ≥30                      | 41.2             | 1.05 (0.56 to 3.85)  | 0.95 (0.52 to 1.74)  | 0.92 (0.50 to 1.69)  |

CV= Cardiovascular

\*Adjusted for age and centre.

†Adjusted for age, centre, sex, BMI, physical inactivity, insulin treatment and hypertension.

‡Adjusted for age, centre, sex, BMI, physical inactivity, insulin treatment, hypertension and history of myocardial infarction, stroke or cancer.

**Footnotes**

Contributors: PW, OR, and UN were involved in the study concept and planned the analyses. PW, OR, HB, DS, RK, BT, AS, BBN, and UN contributed in the acquisition of the data. PW was responsible for statistical analyses and drafted the paper. PW, OR, LJ, and UN interpreted the results. All authors participated in critical revision of the manuscript and approved the final version. PW is the guarantor.

Funding: This study was supported by a European Foundation for the Study of Diabetes / Sanofi-Aventis grant. The European Foundation for the Study of Diabetes or Sanofi-Aventis had no role in the design or conduct of the study, collection or analysis of the data, or preparation or approval of the manuscript and did not have any influence on the contents.

Competing interests: All authors have completed the Unified Competing Interest form at [www.icmje.org/coi\\_disclosure.pdf](http://www.icmje.org/coi_disclosure.pdf) (available on request from the corresponding author) and declare: no support from any organisation for the submitted work; no financial relationships with any organisations that might have an interest in the submitted work in the previous 3 years; no other relationships or activities that could appear to have influenced the submitted work.

Ethical approval: The study was approved by the IARC Institutional Review Board.

Data sharing: No additional data available.



## References

1. Hansen LJ, Olivarius Nde F, Siersma V. 16-year excess all-cause mortality of newly diagnosed type 2 diabetic patients: a cohort study. *BMC Public Health* 2009;**9**:400.
2. Mulnier HE, Seaman HE, Raleigh VS, et al. Mortality in people with type 2 diabetes in the UK. *Diabet. Med.* 2006;**23**(5):516-21.
3. Gregg EW, Gu Q, Cheng YJ, et al. Mortality trends in men and women with diabetes, 1971 to 2000. *Ann Intern Med* 2007;**147**(3):149-55.
4. de Grauw WJ, van de Lisdonk EH, van den Hoogen HJ, et al. Cardiovascular morbidity and mortality in type 2 diabetic patients: a 22-year historical cohort study in Dutch general practice. *Diabet Med* 1995;**12**(2):117-22.
5. Vigneri P, Frasca F, Sciacca L, et al. Diabetes and cancer. *Endocr Relat Cancer* 2009;**16**(4):1103-23.
6. UK Prospective Diabetes Study (UKPDS) Group. Effect of intensive blood-glucose control with metformin on complications in overweight patients with type 2 diabetes (UKPDS 34). *Lancet* 1998;**352**(9131):854-65.
7. Stevens RJ, Kothari V, Adler AI, et al. The UKPDS risk engine: a model for the risk of coronary heart disease in Type II diabetes (UKPDS 56). *Clin Sci (Lond)* 2001;**101**(6):671-9.
8. Lloyd-Jones DM, Wilson PW, Larson MG, et al. Framingham risk score and prediction of lifetime risk for coronary heart disease. *Am J Cardiol* 2004;**94**(1):20-4.
9. May M, Lawlor DA, Brindle P, et al. Cardiovascular disease risk assessment in older women: can we improve on Framingham? *British Women's Heart and Health prospective cohort study. Heart* 2006;**92**(10):1396-401.
10. Idler EL, Benyamini Y. Self-rated health and mortality: a review of twenty-seven community studies. *J. Health Soc. Behav.* 1997;**38**(1):21-37.
11. Bosworth HB, Siegler IC, Brummett BH, et al. The association between self-rated health and mortality in a well-characterized sample of coronary artery disease patients. *Med Care* 1999;**37**(12):1226-36.
12. Walker JD, Maxwell CJ, Hogan DB, et al. Does self-rated health predict survival in older persons with cognitive impairment? *J Am Geriatr Soc* 2004;**52**(11):1895-900.
13. Gerber Y, Benyamini Y, Goldbourt U, et al. Prognostic importance and long-term determinants of self-rated health after initial acute myocardial infarction. *Med Care* 2009;**47**(3):342-9.
14. Vadla D, Bozиков J, Akerstrom B, et al. Differences in healthcare service utilisation in elderly, registered in eight districts of five European countries. *Scand J Public Health* 2011;**39**(3):272-9.
15. Deeg DJ, Kriegsman DM. Concepts of self-rated health: specifying the gender difference in mortality risk. *Gerontologist* 2003;**43**(3):376-86; discussion 72-5.
16. Benyamini Y, Blumstein T, Lusky A, et al. Gender differences in the self-rated health-mortality association: is it poor self-rated health that predicts mortality or excellent self-rated health that predicts survival? *Gerontologist* 2003;**43**(3):396-405; discussion 372-5.
17. Lee SJ, Moody-Ayers SY, Landefeld CS, et al. The relationship between self-rated health and mortality in older black and white Americans. *J. Am. Geriatr. Soc.* 2007;**55**(10):1624-9.
18. Dowd JB, Zajacova A. Does the predictive power of self-rated health for subsequent mortality risk vary by socioeconomic status in the US? *Int J Epidemiol* 2007;**36**(6):1214-21.
19. Idler E, Leventhal H, McLaughlin J, et al. In sickness but not in health: self-ratings, identity, and mortality. *J. Health Soc. Behav.* 2004;**45**(3):336-56.
20. Hayes AJ, Clarke PM, Glasziou PG, et al. Can self-rated health scores be used for risk prediction in patients with type 2 diabetes? *Diabetes Care* 2008;**31**(4):795-7.

- 1
  - 2
  - 3
  - 4
  - 5
  - 6
  - 7
  - 8
  - 9
  - 10
  - 11
  - 12
  - 13
  - 14
  - 15
  - 16
  - 17
  - 18
  - 19
  - 20
  - 21
  - 22
  - 23
  - 24
  - 25
  - 26
  - 27
  - 28
  - 29
  - 30
  - 31
  - 32
  - 33
  - 34
  - 35
  - 36
  - 37
  - 38
  - 39
  - 40
  - 41
  - 42
  - 43
  - 44
  - 45
  - 46
  - 47
  - 48
  - 49
  - 50
  - 51
  - 52
  - 53
  - 54
  - 55
  - 56
  - 57
  - 58
  - 59
  - 60
21. McEwen LN, Kim C, Haan MN, et al. Are health-related quality-of-life and self-rated health associated with mortality? Insights from Translating Research Into Action for Diabetes (TRIAD). *Prim Care Diabetes* 2009;**3**(1):37-42.
22. Clarke PM, Hayes AJ, Glasziou PG, et al. Using the EQ-5D index score as a predictor of outcomes in patients with type 2 diabetes. *Med. Care* 2009;**47**(1):61-8.
23. Ferrari P, Slimani N, Ciampi A, et al. Evaluation of under- and overreporting of energy intake in the 24-hour diet recalls in the European Prospective Investigation into Cancer and Nutrition (EPIC). *Public Health Nutr* 2002;**5**(6B):1329-45.
24. Riboli E, Hunt KJ, Slimani N, et al. European Prospective Investigation into Cancer and Nutrition (EPIC): study populations and data collection. *Public Health Nutr* 2002;**5**(6B):1113-24.
25. Sluik D, Boeing H, Montonen J, et al. Associations Between General and Abdominal Adiposity and Mortality in Individuals With Diabetes Mellitus. *Am J Epidemiol* 2011.
26. Nothlings U, Boeing H, Maskarinec G, et al. Food intake of individuals with and without diabetes across different countries and ethnic groups. *Eur. J. Clin. Nutr.* 2011;**65**(5):635-41.
27. Pischon T, Boeing H, Hoffmann K, et al. General and abdominal adiposity and risk of death in Europe. *N Engl J Med* 2008;**359**(20):2105-20.
28. Validity of a short questionnaire to assess physical activity in 10 European countries. *Eur J Epidemiol* 2011.
29. DeSalvo KB, Bloser N, Reynolds K, et al. Mortality prediction with a single general self-rated health question. A meta-analysis. *J Gen Intern Med* 2006;**21**(3):267-75.
30. Pijls LT, Feskens EJ, Kromhout D. Self-rated health, mortality, and chronic diseases in elderly men. The Zutphen Study, 1985-1990. *Am J Epidemiol* 1993;**138**(10):840-8.
31. Prosper MH, Moczulski VL, Qureshi A. Obesity as a predictor of self-rated health. *Am J Health Behav* 2009;**33**(3):319-29.
32. Larsson U, Karlsson J, Sullivan M. Impact of overweight and obesity on health-related quality of life--a Swedish population study. *Int J Obes Relat Metab Disord* 2002;**26**(3):417-24.
33. Thomas SL, Hyde J, Karunaratne A, et al. Being 'fat' in today's world: a qualitative study of the lived experiences of people with obesity in Australia. *Health Expect* 2008;**11**(4):321-30.
34. Maddox GL, Douglass EB. Self-assessment of health: a longitudinal study of elderly subjects. *J. Health Soc. Behav.* 1973;**14**(1):87-93.
35. Krause NM, Jay GM. What do global self-rated health items measure? *Med Care* 1994;**32**(9):930-42.
36. Jylha M, Guralnik JM, Ferrucci L, et al. Is self-rated health comparable across cultures and genders? *J Gerontol B Psychol Sci Soc Sci* 1998;**53**(3):S144-52.
37. Dasbach EJ, Klein R, Klein BE, et al. Self-rated health and mortality in people with diabetes. *Am J Public Health* 1994;**84**(11):1775-9.
38. Pencina MJ, D'Agostino RB, Sr., D'Agostino RB, Jr., et al. Evaluating the added predictive ability of a new marker: from area under the ROC curve to reclassification and beyond. *Stat. Med.* 2008;**27**(2):157-72; discussion 207-12.

### Figure legends

**Figure 1** Forest plot showing adjusted hazard ratios and 95% confidence intervals for the centres included in the study investigating the association between low self-rated health and mortality in individuals with diabetes.

For peer review only

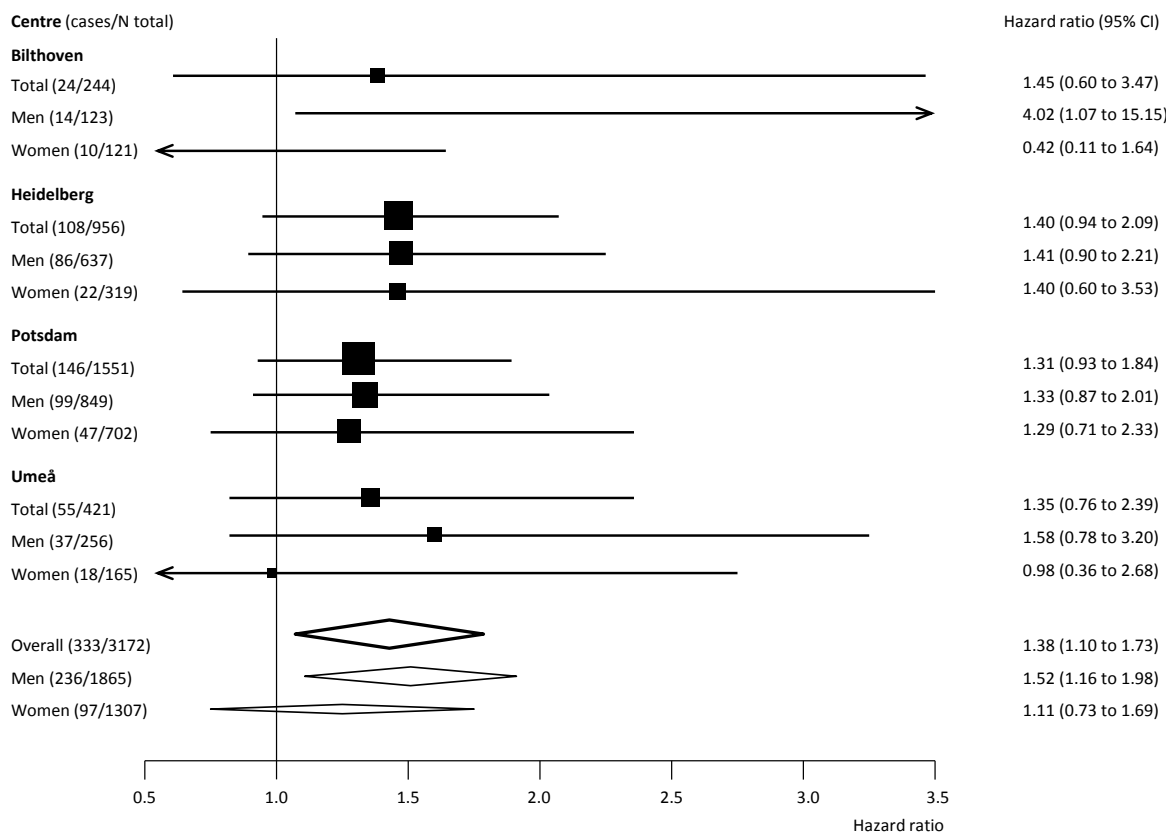

Review only

1  
2  
3  
4  
5  
6  
7  
8  
9  
10  
11  
12  
13  
14  
15  
16  
17  
18  
19  
20  
21  
22  
23  
24  
25  
26  
27  
28  
29  
30  
31  
32  
33  
34  
35  
36  
37  
38  
39  
40  
41  
42  
43  
44  
45  
46  
47  
48  
49  
50  
51  
52  
53  
54  
55  
56  
57  
58  
59  
60

## Appendix

All questionnaires were standardized to fit the question (with four response alternatives):

*How satisfied are you today with your health?*

1 Excellent

2 Good

3 Moderate

4 Poor

Description of the original questions and how they were standardized:

Bilthoven 1993–94

Question: *What do you think about your health in general?*

| Response alternatives          | Standardized  |
|--------------------------------|---------------|
| 1 Excellent                    | 1 Excellent   |
| 2 Good                         | 2 Good        |
| 3 Reasonable                   | 3 Moderate    |
| 4 Mediocre                     | 4 Poor        |
| 5 Poor                         | 4 Poor        |
| 9 More than 1 option indicated | Missing value |

Bilthoven 1995–97

Question: *What do you think about your health in general?*

| Response alternatives          | Standardized  |
|--------------------------------|---------------|
| 1 Excellent                    | 1 Excellent   |
| 2 Very Good                    | 2 Good        |
| 3 Good                         | 2 Good        |
| 4 Reasonable                   | 3 Moderate    |
| 5 Mediocre                     | 4 Poor        |
| 9 More than 1 option indicated | Missing value |

Heidelberg

Question: *On the whole, how satisfied are you today with your health?*

| Response alternatives | Standardized  |
|-----------------------|---------------|
| 1 Very satisfied      | 1 Excellent   |
| 2 More satisfied      | 2 Good        |
| 3 More dissatisfied   | 3 Moderate    |
| 4 Very dissatisfied   | 4 Poor        |
| 8 Do not know         | Missing value |

Potsdam

Question: *On the whole, how satisfied are you today with your health?*

| Response alternatives      | Standardized  |
|----------------------------|---------------|
| 1 Very satisfied           | 1 Excellent   |
| 2 More likely satisfied    | 2 Good        |
| 3 More likely dissatisfied | 3 Moderate    |
| 4 Very dissatisfied        | 4 Poor        |
| 8 Do not know              | Missing value |

Umeå

Question: *How do you judge that your state of health has been in the last year?*

| Response alternatives | Standardized  |
|-----------------------|---------------|
| 1 Very well           | 1 Excellent   |
| 2 Quiet well          | 2 Good        |
| 3 Fairly well         | 3 Moderate    |
| 4 Quiet bad           | 4 Poor        |
| 5 Bad                 | 4 Poor        |
| 9 Inconsistent answer | Missing value |

## Research checklist

STROBE Statement—Checklist of items that should be included in reports of *cohort studies*

|                              | Item No | Recommendation                                                                                                                                                                                                                                                                                                         |
|------------------------------|---------|------------------------------------------------------------------------------------------------------------------------------------------------------------------------------------------------------------------------------------------------------------------------------------------------------------------------|
| <b>Title and abstract</b>    | 1       | (a) Indicate the study's design with a commonly used term in the title or the abstract<br>(b) Provide in the abstract an informative and balanced summary of what was done and what was found                                                                                                                          |
| <b>Introduction</b>          |         |                                                                                                                                                                                                                                                                                                                        |
| Background/rationale         | 2       | Explain the scientific background and rationale for the investigation being reported                                                                                                                                                                                                                                   |
| Objectives                   | 3       | State specific objectives, including any prespecified hypotheses                                                                                                                                                                                                                                                       |
| <b>Methods</b>               |         |                                                                                                                                                                                                                                                                                                                        |
| Study design                 | 4       | Present key elements of study design early in the paper                                                                                                                                                                                                                                                                |
| Setting                      | 5       | Describe the setting, locations, and relevant dates, including periods of recruitment, exposure, follow-up, and data collection                                                                                                                                                                                        |
| Participants                 | 6       | (a) Give the eligibility criteria, and the sources and methods of selection of participants. Describe methods of follow-up<br>(b) For matched studies, give matching criteria and number of exposed and unexposed                                                                                                      |
| Variables                    | 7       | Clearly define all outcomes, exposures, predictors, potential confounders, and effect modifiers. Give diagnostic criteria, if applicable                                                                                                                                                                               |
| Data sources/<br>measurement | 8*      | For each variable of interest, give sources of data and details of methods of assessment (measurement). Describe comparability of assessment methods if there is more than one group                                                                                                                                   |
| Bias                         | 9       | Describe any efforts to address potential sources of bias                                                                                                                                                                                                                                                              |
| Study size                   | 10      | Explain how the study size was arrived at                                                                                                                                                                                                                                                                              |
| Quantitative variables       | 11      | Explain how quantitative variables were handled in the analyses. If applicable, describe which groupings were chosen and why                                                                                                                                                                                           |
| Statistical methods          | 12      | (a) Describe all statistical methods, including those used to control for confounding<br>(b) Describe any methods used to examine subgroups and interactions<br>(c) Explain how missing data were addressed<br>(d) If applicable, explain how loss to follow-up was addressed<br>(e) Describe any sensitivity analyses |
| <b>Results</b>               |         |                                                                                                                                                                                                                                                                                                                        |
| Participants                 | 13*     | (a) Report numbers of individuals at each stage of study—eg numbers potentially eligible, examined for eligibility, confirmed eligible, included in the study, completing follow-up, and analysed<br>(b) Give reasons for non-participation at each stage<br>(c) Consider use of a flow diagram                        |
| Descriptive data             | 14*     | (a) Give characteristics of study participants (eg demographic, clinical, social) and information on exposures and potential confounders<br>(b) Indicate number of participants with missing data for each variable of interest<br>(c) Summarise follow-up time (eg, average and total amount)                         |
| Outcome data                 | 15*     | Report numbers of outcome events or summary measures over time                                                                                                                                                                                                                                                         |
| Main results                 | 16      | (a) Give unadjusted estimates and, if applicable, confounder-adjusted estimates and their precision (eg, 95% confidence interval). Make clear which confounders were adjusted for and why they were included<br>(b) Report category boundaries when continuous variables were categorized                              |

|                          |    |                                                                                                                                                                            |
|--------------------------|----|----------------------------------------------------------------------------------------------------------------------------------------------------------------------------|
|                          |    | (c) If relevant, consider translating estimates of relative risk into absolute risk for a meaningful time period                                                           |
| Other analyses           | 17 | Report other analyses done—eg analyses of subgroups and interactions, and sensitivity analyses                                                                             |
| <b>Discussion</b>        |    |                                                                                                                                                                            |
| Key results              | 18 | Summarise key results with reference to study objectives                                                                                                                   |
| Limitations              | 19 | Discuss limitations of the study, taking into account sources of potential bias or imprecision. Discuss both direction and magnitude of any potential bias                 |
| Interpretation           | 20 | Give a cautious overall interpretation of results considering objectives, limitations, multiplicity of analyses, results from similar studies, and other relevant evidence |
| Generalisability         | 21 | Discuss the generalisability (external validity) of the study results                                                                                                      |
| <b>Other information</b> |    |                                                                                                                                                                            |
| Funding                  | 22 | Give the source of funding and the role of the funders for the present study and, if applicable, for the original study on which the present article is based              |

\*Give information separately for exposed and unexposed groups.

**Note:** An Explanation and Elaboration article discusses each checklist item and gives methodological background and published examples of transparent reporting. The STROBE checklist is best used in conjunction with this article (freely available on the Web sites of PLoS Medicine at <http://www.plosmedicine.org/>, Annals of Internal Medicine at <http://www.annals.org/>, and Epidemiology at <http://www.epidem.com/>). Information on the STROBE Initiative is available at <http://www.strobe-statement.org>.
